# Supplementary material for: Targeting Host Metabolic Niche to Kill Malaria Parasites
Source: Research Square preprint supplement (doi:10.21203/rs.3.rs-4535885/v1), 2024-07-12
Supplement: Supplementary file 1 [file 0b2327312b923c745ffecf75.xlsx]

## Sheet: Suppelmental Table S1
Supplemental Table S1. Gene expression levels of terminal erythropoiesis related genes. (Eight erythropoiesis developmental stages were analyzed for heme related metabolism in erythroid)
Uniprot Entry	Protein names	Gene Symbol	Myeloblast_I	Myelomonocytic_precu	MyeloMonocytic_proge	ERY_1	Ery1_II	ERY_2	Ery2_II	ERY_3	Encoding mitochondrial enzymes	pValues.adj (early vs late erythropoiesis)
P13196	5-aminolevulinate synthase, non-specific, mitochondrial (ALAS-H) (EC 2.3.1.37) (5-aminolevulinic acid synthase 1) (Delta-ALA synthase 1) (Delta-aminolevulinate synthase 1)	ALAS1	13.7167	4.89731	15.735	10.0952	4.34024	3.39567	4.36856	3.1885	Yes	0.322769
P22557	5-aminolevulinate synthase, erythroid-specific, mitochondrial (ALAS-E) (EC 2.3.1.37) (5-aminolevulinic acid synthase 2) (Delta-ALA synthase 2) (Delta-aminolevulinate synthase 2)	ALAS2	0.60684	0.47772	0.25308	2.2416	5.05886	788.346	305.308	1738.73	Yes	0.0130344
P13716	Delta-aminolevulinic acid dehydratase (ALADH) (EC 4.2.1.24) (Porphobilinogen synthase)	ALAD	20.9046	15.9067	10.1541	40.6801	44.3115	185.293	150.01	205.504	No	0.0165013
P08397	Porphobilinogen deaminase (PBG-D) (EC 2.5.1.61) (Hydroxymethylbilane synthase) (HMBS) (Pre-uroporphyrinogen synthase)	HMBS	14.9284	16.1874	6.15628	32.1011	46.4583	544.734	305.654	993.59	No	0.0130344
P10746	Uroporphyrinogen-III synthase (UROIIIS) (UROS) (EC 4.2.1.75) (Hydroxymethylbilane hydrolyase [cyclizing]) (Uroporphyrinogen-III cosynthase)	UROS	34.8805	32.9316	22.5541	46.8962	45.0392	119.505	98.3563	89.9609	No	0.0181493
P06132	Uroporphyrinogen decarboxylase (UPD) (URO-D) (EC 4.1.1.37)	UROD	50.1851	43.9997	24.0886	131.183	167.559	406.864	340.255	569.149	No	0.0139476
P36551	Oxygen-dependent coproporphyrinogen-III oxidase, mitochondrial (COX) (Coprogen oxidase) (Coproporphyrinogenase) (EC 1.3.3.3)	CPOX	9.86639	2.22423	4.37582	7.3245	8.22483	128.276	81.2668	220.622	Yes	0.0234787
P50336	Protoporphyrinogen oxidase (PPO) (EC 1.3.3.4)	PPOX	6.13654	5.3289	3.06398	17.4166	22.4608	82.4733	61.8461	117.664	Yes	0.0126403
P22830	Ferrochelatase, mitochondrial (EC 4.98.1.1) (Heme synthase) (Protoheme ferro-lyase)	FECH	6.55791	5.05393	3.09435	15.4866	22.1304	161.144	91.188	295.644	Yes	0.0139476
Q9UPI3	Heme transporter FLVCR2 (Calcium-chelate transporter) (CCT) (Feline leukemia virus subgroup C receptor-related protein 2)	FLVCR2	0.56969	0.18298	0.51556	0.0649	0.09098	0.05617	0.05369	0.05388	Membrane protein	0.127701
Q9Y5Y0	Heme transporter FLVCR1 (Feline leukemia virus subgroup C receptor-related protein 1) (Feline leukemia virus subgroup C receptor) (hFLVCR)	FLVCR1	3.01105	2.8856	2.78072	2.79029	3.27661	2.09425	2.94781	0.98474	Membrane protein	0.616062
Q9NP59	Solute carrier family 40 member 1 (Ferroportin-1) (Iron-regulated transporter 1)	SLC40A1	17.8708	5.89185	5.30154	118.556	136.62	91.8286	71.1826	80.9037	Membrane protein	0.102146
P02786	Transferrin receptor protein 1 (TR) (TfR) (TfR1) (Trfr) (T9) (p90) (CD antigen CD71) [Cleaved into: Transferrin receptor protein 1, serum form (sTfR)]	TFRC	91.3661	94.4046	87.5768	163.941	213.603	696.023	728.844	726.187	Membrane protein	3.50836e-05
P09601	Heme oxygenase 1 (HO-1) (EC 1.14.14.18) [Cleaved into: Heme oxygenase 1 soluble form]	HMOX1	0.16732	0.36043	0.59947	0.14859	0.02866	1.24065	0.38741	4.08702	No	0.463465
P30519	Heme oxygenase 2 (HO-2) (EC 1.14.14.18) [Cleaved into: Heme oxygenase 2 soluble form]	HMOX2	10.8463	5.11276	1.98545	2.03405	4.2074	1.9475	3.98159	0.2398	No	0.579029
P53004	Biliverdin reductase A (BVR A) (EC 1.3.1.24) (Biliverdin-IX alpha-reductase)	BLVRA	23.4287	28.2094	21.7924	4.30059	8.22817	3.04323	6.85913	39.5412	No	0.616062
P30043	Flavin reductase (NADPH) (FR) (EC 1.5.1.30) (Biliverdin reductase B) (BVR-B) (EC 1.3.1.24) (Biliverdin-IX beta-reductase) (Green heme-binding protein) (GHBP) (NADPH-dependent diaphorase) (NADPH-flavin reductase) (FLR)	BLVRB	23.7693	20.1065	6.91062	1.20887	3.15715	2.21316	3.70959	156.506	No	0.905928
Q9NRV9	Heme-binding protein 1 (p22HBP)	HEBP1	28.0475	21.3044	14.6406	4.18428	6.83387	5.22929	8.41124	36.4077	No	0.6964
Q9Y5Z4	Heme-binding protein 2 (Placental protein 23) (PP23) (Protein SOUL)	HEBP2	34.6384	36.6654	34.9462	26.467	32.9055	25.9005	37.4581	30.2259	No	0.616062
P07919	Cytochrome b-c1 complex subunit 6, mitochondrial (Complex III subunit 6) (Complex III subunit VIII) (Cytochrome c1 non-heme 11 kDa protein) (Mitochondrial hinge protein) (Ubiquinol-cytochrome c reductase complex 11 kDa protein)	UQCRH	233.772	309.383	199.27	115.802	167.367	173.105	258.934	260.184	Yes	0.900517
Q9UDW1	Cytochrome b-c1 complex subunit 9 (Complex III subunit 9) (Complex III subunit X) (Cytochrome c1 non-heme 7 kDa protein) (Ubiquinol-cytochrome c reductase complex 7.2 kDa protein)	UQCR10	42.5866	38.9755	16.5816	11.3455	19.0441	13.6686	30.62	25.5197	Yes	0.709776
P08574	Cytochrome c1, heme protein, mitochondrial (EC 7.1.1.8) (Complex III subunit 4) (Complex III subunit IV) (Cytochrome b-c1 complex subunit 4) (Ubiquinol-cytochrome-c reductase complex cytochrome c1 subunit) (Cytochrome c-1)	CYC1	63.5839	84.4669	47.891	32.8685	42.5512	65.6869	71.692	82.3969	Yes	0.720721
Q12887	Protoheme IX farnesyltransferase, mitochondrial (EC 2.5.1.141) (Heme O synthase)	COX10	6.43104	5.27562	4.2291	1.76926	3.39117	3.75927	2.71185	4.82619	Yes	0.447734
Q9BQI3	Eukaryotic translation initiation factor 2-alpha kinase 1 (EC 2.7.11.1) (Heme-controlled repressor) (HCR) (Heme-regulated eukaryotic initiation factor eIF-2-alpha kinase) (Heme-regulated inhibitor) (hHRI) (Hemin-sensitive initiation factor 2-alpha kinase)	EIF2AK1	48.0684	42.4876	24.8402	15.6491	29.4179	20.0099	41.0933	62.7138	No	0.989655
Q9BX63	Fanconi anemia group J protein (EC 3.6.4.12) (BRCA1-associated C-terminal helicase 1) (BRCA1-interacting protein C-terminal helicase 1) (BRCA1-interacting protein 1)	BACH1	13.2188	16.4224	16.8743	28.907	37.6555	28.2358	24.7721	22.3168	No	0.0447152
P23769	Endothelial transcription factor GATA-2 (GATA-binding protein 2)	GATA2	17.8911	8.04733	8.73484	0.06299	0.05491	0.07462	0.04338	60.913	No	0.616062
Q12778	Forkhead box protein O1 (Forkhead box protein O1A) (Forkhead in rhabdomyosarcoma)	FOXO1	1.64053	0.64377	5.8385	111.224	33.0561	90.637	13.4271	4.83145	No	0.322769
