# Supplementary material for: Targeting Host Metabolic Niche to Kill Malaria Parasites
Source: Research Square preprint supplement (doi:10.21203/rs.3.rs-4535885/v1), 2024-07-12
Supplement: Supplementary file 2 [file 70a6f179f1a700d2420d7b87.xlsx]

## Sheet: Sheet1
Supplemental Table S4: Drug synergy experimental raw results of DHA and ALA interaction in killing HC-04 liver cancer cell line. Experimental triplates were performed as listed in 3 plates data.
Plate 1
		DMSO	DMSO	ALA mM	ALA mM	ALA mM	ALA mM	ALA mM	ALA mM	ALA mM	ALA mM	ALA mM	ALA mM	ALA mM	ALA mM	ALA mM	ALA mM	ALA mM	ALA mM	ALA 2 mM	ALA 2mM	DHA 132 uM	DHA 132uM	Positive	Negetive
				2	1	0.5	0.25	0.125	0.0625	0.03125	0.015625	0.0078125	0.00390625	0.00195312	0.000976562	0.000488281	0.000244141	0.00012207	6.10352e-05
DHA uM		1	2	3	4	5	6	7	8	9	10	11	12	13	14	15	16	17	18	19	20	21	22	23	24
132	A	70016.8	70016.8	175	187	137	268	350	59068	306	7606	18018	36368	48537	57393	61818	61637	60075	61556	63412	63412	57674.5	57674.5	67745.3	159.8
66	B	70016.8	70016.8	281	337	350	331	268	60087	2550	16050	31400	42175	47718	47543	53912	54668	54643	56343	71837	71837	54331	54331	67745.3	159.8
33	C	70016.8	70016.8	368	350	275	268	481	60168	1437	11768	25081	39281	41468	41300	46200	47868	46918	46656	71821.5	71821.5	53146.5	53146.5	67745.3	159.8
16.5	D	70016.8	70016.8	381	281	281	331	475	61325	1600	12912	29775	38225	42581	44393	47000	51718	43137	50512	71581	71581	53218	53218	67745.3	159.8
8.25	E	70016.8	70016.8	350	437	337	368	475	61256	2900	17493	36312	42737	48381	47850	51343	52693	45712	51556	69909	69909	56409	56409	67745.3	159.8
4.125	F	70016.8	70016.8	437	593	418	350	443	62125	4775	20806	36937	49293	48893	47031	56075	53931	46206	52000	68246.5	68246.5	55656	55656	67745.3	159.8
2.0625	G	70016.8	70016.8	400	362	412	668	468	63331	7962	27118	43006	54343	52768	48862	57493	57656	50281	57675	69027.5	69027.5	60806	60806	67745.3	159.8
1.03125	H	70016.8	70016.8	518	1168	1337	1612	1093	63543	12900	34787	53243	58293	57756	57525	59493	61243	54718	59256	69455.5	69455.5	62312	62312	67745.3	159.8
0.515625	I	70016.8	70016.8	943	2337	3606	5393	2150	62762	33162	52200	60143	62093	63225	66331	63062	64275	58800	61162	68587	68587	63846.5	63846.5	67745.3	159.8
0.257812	J	70016.8	70016.8	2950	6543	8193	13968	6331	61281	50550	63831	66462	63612	65237	69887	67700	64956	59693	64337	68893.5	68893.5	64596.5	64596.5	67745.3	159.8
0.128906	K	70016.8	70016.8	6018	13687	21575	28212	20225	64056	55656	67537	63681	56843	57231	71537	76131	64756	58375	63637	63871.5	63871.5	70705.5	70705.5	67745.3	159.8
0.0644531	L	70016.8	70016.8	14293	29018	40012	41262	40612	67100	53137	69875	65537	56031	63962	74768	74737	65975	57475	68050	65693.5	65693.5	70355.5	70355.5	67745.3	159.8
0.0322266	M	70016.8	70016.8	25237	43918	49712	53625	49687	63425	62693	70050	68031	62975	61212	75525	72618	68156	66643	70031	67699.5	67699.5	72812.5	72812.5	67745.3	159.8
0.0161133	N	70016.8	70016.8	57787	63556	53775	59218	56137	64262	61506	70775	65937	63881	64850	72975	76887	68250	60162	64693	69721.5	69721.5	70387	70387	67745.3	159.8
0.00805664	O	70016.8	70016.8	58056	62800	59975	62887	61618	61681	62381	68637	64456	64587	65525	76137	71050	65568	62331	64350	65605.5	65605.5	67578	67578	67745.3	159.8
0.00402832	P	70016.8	70016.8	58468	64456	64300	64493	69837	65975	65625	66656	62775	74475	68781	79043	73100	68143	68743	63437	69606	69606	70599.5	70599.5	67745.3	159.8
Plate 2
		1	2	3	4	5	6	7	8	9	10	11	12	13	14	15	16	17	18	19	20	21	22	23	24
	A	65757.5	65757.5	343	193	300	350	556	437	1225	9400	29537	47856	42393	55937	57750	69575	71450	65312	73543.5	73543.5	60087	60087	57891	175
	B	65757.5	65757.5	300	368	318	356	362	293	7431	21881	37512	43462	52675	46462	47675	55000	57650	55337	73415.5	73415.5	34809	34809	57891	175
	C	65757.5	65757.5	400	487	256	337	281	393	4062	16075	30637	40068	46175	46225	47468	52168	52337	52950	70862.5	70862.5	53371.5	53371.5	57891	175
	D	65757.5	65757.5	443	318	325	256	462	550	4681	16168	30050	38975	52362	45643	51050	52318	53093	56975	71090.5	71090.5	46593.5	46593.5	57891	175
	E	65757.5	65757.5	331	400	293	306	318	562	5668	21587	38100	46356	50887	51062	50843	55193	53725	54206	71512	71512	55593	55593	57891	175
	F	65757.5	65757.5	437	343	356	250	287	800	5756	23812	40300	49881	52068	54487	51931	54193	55156	56181	68796.5	68796.5	56271.5	56271.5	57891	175
	G	65757.5	65757.5	375	443	656	331	475	968	6681	30175	44687	53312	53843	56750	55675	60068	55893	57393	70040.5	70040.5	57321.5	57321.5	57891	175
	H	65757.5	65757.5	581	812	1168	831	937	21187	9400	33750	49681	55318	56981	59612	58375	61281	59743	62018	69109	69109	59118.5	59118.5	57891	175
	I	65757.5	65757.5	900	1462	1825	3156	2368	48893	22400	46618	48006	60331	58743	40225	61325	60412	61093	66506	67443.5	67443.5	61212	61212	57891	175
	J	65757.5	65757.5	1550	3112	3000	4431	2987	25712	36900	50093	56568	61843	60575	61143	62025	63768	61600	65725	68952.5	68952.5	64080.5	64080.5	57891	175
	K	65757.5	65757.5	1843	4293	5375	5675	7156	54706	39781	53800	58743	62912	60518	62962	63468	63500	65862	66300	67390	67390	65496.5	65496.5	57891	175
	L	65757.5	65757.5	2968	5293	10243	11462	11256	65087	46362	57912	62631	67293	63162	60575	63475	64731	64156	66562	70296.5	70296.5	65737.5	65737.5	57891	175
	M	65757.5	65757.5	3812	7025	8525	13000	12962	55568	48868	56743	57425	64556	63581	63500	63768	64025	60750	67137	69484	69484	67221.5	67221.5	57891	175
	N	65757.5	65757.5	4512	7987	10737	13750	24600	62193	46931	56962	59781	65268	59862	62975	63962	63425	62350	64962	69596.5	69596.5	64946.5	64946.5	57891	175
	O	65757.5	65757.5	12300	17793	21612	24006	25550	55337	55387	59693	60412	67875	63900	61731	64231	64525	63718	65593	72305.5	72305.5	63571.5	63571.5	57891	175
	P	65757.5	65757.5	21206	26600	32762	40156	43506	47831	43500	60643	58950	63068	65500	63143	65643	64862	63343	66925	66274.5	66274.5	68493.5	68493.5	57891	175
Plate 3
		1	2	3	4	5	6	7	8	9	10	11	12	13	14	15	16	17	18	19	20	21	22	23	24
	A	64216.4	64216.4	162	143	225	125	693	412	1412	14081	39181	47487	62087	57581	48906	56475	49987	52681	73484	73484	75552.5	75552.5	70601.2	183.2
	B	64216.4	64216.4	406	393	318	331	225	500	2606	18481	32012	38668	49800	46975	41150	50768	46437	42731	71199.5	71199.5	72615.5	72615.5	70601.2	183.2
	C	64216.4	64216.4	412	425	375	331	281	400	2781	15125	27512	34781	44393	46706	43131	47987	48725	44287	68346.5	68346.5	69640.5	69640.5	70601.2	183.2
	D	64216.4	64216.4	325	350	400	318	325	562	4318	20737	31987	39700	46450	47093	47250	49981	46218	43500	67406	67406	69968.5	69968.5	70601.2	183.2
	E	64216.4	64216.4	450	275	306	356	262	637	3793	20075	36693	41050	47256	49012	46731	50962	50818	49862	70302.5	70302.5	71209	71209	70601.2	183.2
	F	64216.4	64216.4	506	368	356	506	281	743	5006	23487	39000	44856	48106	51000	50912	52756	53962	51893	70540	70540	69212	69212	70601.2	183.2
	G	64216.4	64216.4	356	362	575	325	393	1018	8731	28693	44187	48500	50375	54143	54162	57012	55118	60306	68784	68784	67715	67715	70601.2	183.2
	H	64216.4	64216.4	612	575	943	762	725	1493	11143	32868	47056	53862	51575	56331	55650	59493	61306	68875	68812	68812	69543.5	69543.5	70601.2	183.2
	I	64216.4	64216.4	687	1268	1618	1568	1100	3450	22125	40606	53937	56962	56487	61900	59718	66656	71150	64562	69631	69631	70515.5	70515.5	70601.2	183.2
	J	64216.4	64216.4	1568	1937	2956	2225	3287	5237	29343	48168	53356	59362	57456	62225	60206	61962	62875	62856	71693.5	71693.5	71868.5	71868.5	70601.2	183.2
	K	64216.4	64216.4	1318	2218	4218	3287	4800	7262	33250	52793	57756	57062	62956	61906	65581	65506	62643	63543	72687.5	72687.5	70753	70753	70601.2	183.2
	L	64216.4	64216.4	2231	3762	4437	5156	6706	6831	47131	53168	57643	59243	63443	62131	64481	63437	70868	66675	71152.5	71152.5	73355.5	73355.5	70601.2	183.2
	M	64216.4	64216.4	2212	3031	4931	4062	9418	10775	44237	55056	59668	61931	61700	62700	62675	68100	70606	63975	70771.5	70771.5	71646.5	71646.5	70601.2	183.2
	N	64216.4	64216.4	2575	3993	6587	6093	10862	12162	48343	58037	58012	58450	61462	62262	64350	65431	65643	65925	71840	71840	73728	73728	70601.2	183.2
	O	64216.4	64216.4	5237	8537	11675	12993	21318	24531	54643	60356	60875	59400	66050	60356	62475	68018	63793	65968	73165.5	73165.5	74337	74337	70601.2	183.2
	P	64216.4	64216.4	10462	19643	29175	24512	39325	39387	42462	63350	62631	60050	61306	62006	61968	64531	63112	58450	66921.5	66921.5	66052.5	66052.5	70601.2	183.2
