# Supplementary material for: Targeting Host Metabolic Niche to Kill Malaria Parasites
Source: Research Square preprint supplement (doi:10.21203/rs.3.rs-4535885/v1), 2024-07-12
Supplement: Supplementary file 3 [file cecc53aba8612ca3d4d0bb25.xlsx]

## Sheet: Supplmental Table S3
Suppelemental S3 P. falciparum host remodel gene analysis. (data retrieved from PlasmoDB v68)
PlasmoDB ID	Product Description	Gene Name or Symbol	Ring gene expression TPM (Lopez-Barragan et al.)	Early Trophozoite gene expression TPM (Lopez-Barragan et al.)	Late Trophozoite v	Schizont gene expression TPM (Lopez-Barragan et al.)	Gametocyte II gene expression TPM (Lopez-Barragan et al.)	Gametocyte V gene expression TPM (Lopez-Barragan et al.)	Ookinete gene expression TPM (Lopez-Barragan et al.)	P.falciparum 3D7 piggyBac insertion mutagenesis - mutagenesis index score (Zhang et al)	P.falciparum 3D7 piggyBac insertion mutagenesis - mutant fitness score (Zhang et al)	ArtemisininTextSearchScore	GeneGroupExportDHAresistance
PF3D7_0302200	cytoadherence linked asexual protein 3.2 (CLAG3.2)	CLAG3.2	2.21	0.5222	47.0205	104.608	0.5691	0.4104	0.3291				RBCpermibility
PF3D7_0302500	cytoadherence linked asexual protein 3.1 (CLAG3.1)	CLAG3.1	5.0795	0.6523	169.302	458.761	6.2042	2.2331	37.1655				RBCpermibility
PF3D7_0904900	copper-transporting ATPase (CuTP)	CuTP	4.1446	4.3107	68.4529	18.3813	5.9786	6.3266	21.6033				RBCpermibility
PF3D7_0905400	high molecular weight rhoptry protein 3 (RhopH3)	RhopH3	20.8853	3.9733	1027.6	1556.07	30.9011	4.2819	334.462				RBCpermibility
PF3D7_0929400	high molecular weight rhoptry protein 2 (RhopH2)	RhopH2	9.2099	1.4566	436.1	483.742	8.0278	14.2933	167.747				RBCpermibility
PF3D7_1439000	copper transporter	copper transporter	23.0007	3.3597	235.598	177.26	12.1153	88.311	25.6903				RBCpermibility
PF3D7_1455400	hemolysin III (HlyIII)	HlyIII	29.2631	22.6012	35.0875	7.9622	45.4648	74.3296	37.9035				RBCpermibility
PF3D7_1343700	kelch protein K13	Kelch13	51.5479	42.0631	43.164	27.4909	13.7652	10.9781	28.8679	0.122	-2.96	20.9	ArtemisininR
PF3D7_0104300	ubiquitin carboxyl-terminal hydrolase 1, putative	UBP1	53.1186	50.9048	45.9731	17.8865	4.891	12.9618	21.9863	0.292	-2.606	19.55	ArtemisininR
PF3D7_0515300	phosphatidylinositol 3-kinase	PI3K	13.7781	18.417	43.819	50.8215	8.2452	21.3194	20.7619	0.242	-2.674	19.23	ArtemisininR
PF3D7_0813000	protein KIC7	KIC7	34.448	33.0379	41.8769	10.7767	7.759	30.4273	38.8648	0.241	-2.482	17.28	ArtemisininR
PF3D7_1107400	DNA repair protein RAD51	RAD51	29.2445	18.9756	159.268	49.962	89.8144	267.151	522.184	0.307	-2.691	17.27	ArtemisininR
PF3D7_1251200	coronin	N/A	13.2144	1.534	115.862	190.092	2.9179	6.6982	149.272	0.999	-2.201	17.23	ArtemisininR
PF3D7_1342900	AP2 domain transcription factor AP2-HS	AP2-HS	7.0962	13.1021	6.8664	0.66	2.6882	15.8505	11.3603	1	-1.975	16.94	ArtemisininR
PF3D7_1218300	AP-2 complex subunit mu	AP2-MU	38.2644	8.8809	32.2372	21.1061	5.304	18.0782	9.7474	0.22	-3.402	13.31	ArtemisininR
PF3D7_1138700	protein KIC5	KIC5	20.9036	15.6237	9.5441	2.4086	3.3698	16.9764	20.6891	0.831	-2.986	12.02	ArtemisininR
PF3D7_0807700	serine protease DegP	DegP	36.8334	17.1448	24.155	36.8935	12.0365	11.4632	17.6698	1	0.991	11.56
PF3D7_1409300	DNA damage-inducible protein 1	DDI1	3.634	2.2082	45.9081	37.3463	14.0693	52.0539	56.014	0.13	-2.861	10.2
PF3D7_0106300	calcium-transporting ATPase	ATP6	93.2613	83.6136	280.664	337.675	27.5597	16.4584	54.6447	0.131	-2.942	10.18
PF3D7_1136600	modulator of ring stage translation MRST	MRST	101.837	41.0739	16.3586	2.2215	4.7102	15.0204	18.3308	0.123	-2.986	9.967
PF3D7_1122500	protein KIC10	KIC10	1.9558	1.3235	7.8352	3.5043	1.18	7.6281	6.6727	0.125	-2.929	9.967
PF3D7_1246300	protein KIC4	KIC4	23.4843	4.4298	22.6785	20.0569	4.8655	7.7782	39.3457	1	-2.684	9.967
PF3D7_1435500	clathrin light chain, putative	CLC	66.863	19.3822	33.8844	22.2834	25.8754	293.091	106.078	0.305	-2.753	9.743
PF3D7_1025000	Eps15-like protein	EPS15	64.1297	29.1784	51.5611	67.7103	18.0481	44.664	163.541	0.297	-2.777	8.939
PF3D7_1014900	protein KIC8	KIC8	3.2659	0.823	19.526	27.5434	2.3473	52.89	101.867	1	-0.585	8.939
PF3D7_1227700	protein KIC2	KIC2	30.6493	12.0169	17.9433	21.9544	6.1727	33.3586	270.644	1	0.291	8.939
PF3D7_1442400	protein KIC9	KIC9	8.1969	34.6319	18.0619	10.1492	7.6469	36.5614	38.1662	1	-0.445	8.939
PF3D7_1022600	kelch protein K10	Kelch10	23.4054	16.9486	5.7197	0.7688	1.9314	15.4678	20.9138	1	-0.928	8.939
PF3D7_0403500	ubiquitin-specific protease	USP	7.9831	9.3593	17.5116	13.6816	4.8449	40.9342	36.0541	0.197	-3.366	8.585
PF3D7_0417200	bifunctional dihydrofolate reductase-thymidylate synthase	DHFR-TS	4.0566	4.3833	60.4907	16.8914	10.4733	11.938	179.965	0.125	-3.031	7.733
PF3D7_0810800	hydroxymethyldihydropterin pyrophosphokinase-dihydropteroate synthase	PPPK-DHPS	11.4674	18.1685	16.722	2.2171	1.6073	1.371	3.9579	0.195	-2.767	7.733
PF3D7_0528100	AP-1/2 complex subunit beta, putative	N/A	68.6567	61.8981	102.17	55.4111	10.0904	16.6425	44.6318	0.12	-2.959	7.673
PF3D7_1012900	autophagy-related protein 18	ATG18	222.932	142.349	99.2098	25.1997	27.5166	61.741	42.8431	0.141	-3.265	7.673
PF3D7_0914400	protein KIC3	KIC3	3.8971	1.5858	114	190.454	422.433	1933.05	447.723	0.342	-4.094	7.673
PF3D7_0606000	protein KIC1	KIC1	146.477	47.0479	47.4874	22.651	11.6102	22.1994	39.8875	0.96	-2.925	7.673
PF3D7_0609700	protein KIC6	KIC6	107.151	34.1843	24.243	27.0937	14.3004	20.4202	262.613	1	-2.368	7.673
PF3D7_0523000	multidrug resistance protein 1	MDR1	205.15	206.548	107.5	19.0421	10.3258	29.8091	87.0353	0.128	-2.943	7.642
PF3D7_1121600	exported protein 1	EXP1	4431.27	18716.4	9479.1	4807.76	6336.69	243.63	655.218	0.988	-1.886	7.218
PF3D7_0728000	eukaryotic translation initiation factor 2 subunit alpha	eIF2alpha	297.348	179.005	352.022	118.455	29.5476	31.5289	79.1429	0.12	-3.124	7.166
PF3D7_0918900	gamma-glutamylcysteine synthetase	gammaGCS	49.6105	84.8304	42.7438	6.7216	10.4044	35.7439	138.949	0.137	-2.846	6.794
PF3D7_1219100	clathrin heavy chain, putative	CHC	21.0204	9.9874	41.2689	14.6121	3.284	26.9753	23.3422	0.121	-3.091	6.721
PF3D7_0303600	plasmoredoxin	Plrx	1.7398	5.5797	5.1812	4.3542	15.4773	38.2361	0	0.185	-3.715	6.392
PF3D7_0918600	ATP-dependent DNA helicase Q1	RECQ1	3.1025	6.3809	10.8742	2.0158	2.5644	11.2139	12.795	1	-1.756	6.329
PF3D7_0623200	ferredoxin--NADP reductase	FNR	26.7518	22.0963	30.5272	12.6413	5.4196	128.12	77.7296	0.162	-2.798	5.667
PF3D7_0823300	histone acetyltransferase GCN5	GCN5	76.0718	199.724	111.368	31.2088	14.3776	22.2174	29.2679	0.368	-2.517	5.667
PF3D7_0628200	eukaryotic translation initiation factor 2-alpha kinase	PK4	61.7225	43.4943	51.7542	18.6503	5.9881	22.4177	59.9476	0.14	-2.881	5.385
PF3D7_1318100	ferredoxin	FD	3.7472	18.4334	83.4162	30.1447	152.455	129.249	45.4419	0.659	-2.447	5.385
PF3D7_0511000	translationally-controlled tumor protein homolog	TCTP	284.033	287.507	354.042	121.893	364.011	1518.68	509.762	0.994	0.283	5.385
PF3D7_1115700	cysteine proteinase falcipain 2a	FP2A	74.4707	202.505	54.4646	3.636	3.1744	7.9281	2.8848	0.12	-2.998	3.482
PF3D7_0709000	chloroquine resistance transporter	CRT	182.904	145.833	63.251	13.1395	34.9318	39.3069	46.0891	0.127	-3.025	3.354
PF3D7_0206800	merozoite surface protein 2	MSP2	218.718	242.423	8933.03	61741	159.518	39.1771	413.419	0.988	-2.005	2.77
PF3D7_1133300	cell division control protein CDC50B	CDC50B	1.991	0.36	14.6494	18.1525	0.4994	1.5847	15.2494	0.119	-3.087		Host targeted
PF3D7_1368000	conserved protein, unknown function	N/A	2.9902	1.2389	6.0003	1.5307	12.028	35.089	10.9307	0.119	-2.837		Host targeted
PF3D7_0631400	Pfmc-2TM Maurer's cleft two transmembrane protein	MC-2TM	0.2999	0.1139	0	0	0.316	0.2785	0	0.119	-2.931		Host targeted
PF3D7_0114800	Plasmodium exported protein (hyp7), unknown function	N/A	3.9578	5.0104	0.13	0	0.3474	0.4594	0	0.119	-3.122		Host targeted
PF3D7_1001600	exported lipase 2	XL2	6.6495	6.4346	375.264	116.692	1.1035	1.3956	17.7028	0.12	-3.009		Host targeted
PF3D7_0301500	Plasmodium exported protein, unknown function	N/A	11.5986	4.0804	5.9672	0.6875	5.5306	31.5186	3.2728	0.12	-3.127		Host targeted
PF3D7_0702600	chitinase, fragment	N/A	13.0485	6.9079	1.5585	0	21.6608	8.4452	3651.53	0.12	-2.679		Host targeted
PF3D7_0832300	Plasmodium exported protein (PHISTa-like), unknown function	N/A	1.8736	0.5082	0.1055	0	0	0.3728	0	0.12	-2.884		Host targeted
PF3D7_1100500	rifin	RIF	0.6365	0.1611	0.2508	0	0	0.0985	0	0.12	-3.412		Host targeted
PF3D7_0601100	exported protein family 3	EPF3	0	0	0	0	0	0	0	0.12	-2.914		Host targeted
PF3D7_0400900	rifin	RIF	2.2142	6.8879	0.6649	0.5937	0	0.2937	0	0.12	-2.908		Host targeted
PF3D7_1479200	Plasmodium exported protein (PHISTa), unknown function	N/A	0.8546	0.0927	0.1924	0	0.1286	0.2267	0	0.12	-2.827		Host targeted
PF3D7_0532500	Plasmodium exported protein, unknown function	N/A	5.419	21.2309	5.6209	0.803	1.5023	1.5891	0	0.121	-3.3		Host targeted
PF3D7_1125000	conserved protein, unknown function	N/A	24.6322	8.2651	143.75	160.254	339.485	190.098	72.1202	0.121	-2.945		Host targeted
PF3D7_0721100	conserved protein, unknown function	N/A	12.7822	58.2546	171.971	41.1875	47.8783	130.568	78.0469	0.121	-2.967		Host targeted
PF3D7_1252800	Plasmodium exported protein (PHISTb), unknown function	N/A	31.6882	38.9078	38.1924	5.4688	5.554	8.0909	9.6697	0.121	-2.946		Host targeted
PF3D7_0532600	Plasmodium exported protein, unknown function	N/A	3.8662	42.9085	21.8426	0.6047	5.8831	1.9945	0	0.121	-3.222		Host targeted
PF3D7_0702000	Plasmodium exported protein (hyp12), unknown function	N/A	66.9046	1.1818	1.338	0.3982	1.3411	2.2329	39.8127	0.121	-3.1		Host targeted
PF3D7_1253800	Plasmodium exported protein (PHISTa), unknown function	N/A	0.2441	0	0	0	0	0	0	0.121	-3.349		Host targeted
PF3D7_1109900	60S ribosomal protein L36	RPL36	142.879	324.181	150.017	84.9654	107.051	79.4938	260.016	0.122	-2.914		Host targeted
PF3D7_0220700	Plasmodium exported protein (hyp9), unknown function	N/A	126.669	62.6806	18.323	1.9361	2.4631	5.364	11.0603	0.124	-2.734		Host targeted
PF3D7_1401100	DnaJ protein, putative	N/A	517.494	45.9448	20.4197	1.1923	0.5204	1.2452	30.2719	0.124	-2.979		Host targeted
PF3D7_1233800	conserved protein, unknown function	N/A	18.1544	49.0301	218.912	167.07	511.248	443.786	166.724	0.124	-3.151		Host targeted
PF3D7_0220100	DnaJ protein, putative	N/A	49.8232	35.9643	10.4169	0.8834	1.9467	5.4069	7.0096	0.125	-3.131		Host targeted
PF3D7_0936400	ring-exported protein 4	REX4	14.4039	7.8676	2.0413	0	28.8139	75.295	56.3991	0.125	-3.142		Host targeted
PF3D7_0425400	Plasmodium exported protein (PHISTa), unknown function	N/A	1.7997	0.1139	0	0	0.316	0.1392	0	0.125	-2.73		Host targeted
PF3D7_0800800	Plasmodium exported protein (hyp7), unknown function	N/A	2.9825	41.6592	1.4368	0	0.3491	2.4618	19.9876	0.126	-2.927		Host targeted
PF3D7_0111400	conserved Plasmodium protein, unknown function	GEXP19	2.3713	1.6174	11.8266	3.2702	7.2395	38.4241	103.784	0.126	-3.209		Host targeted
PF3D7_0927900	phosphatidylserine decarboxylase	PSD	90.8235	22.2492	170.393	237.177	24.7485	51.7543	81.682	0.127	-2.96		Host targeted
PF3D7_1478000	Plasmodium exported protein (PHISTa), unknown function	GEXP17	72.543	2.148	0.5815	0	26.424	26.4891	0	0.127	-3.106		Host targeted
PF3D7_0937100	Plasmodium exported protein, unknown function	N/A	1.0747	0.102	0	0	0.5661	1.1228	0	0.127	-3.178		Host targeted
PF3D7_0301200	serine/threonine protein kinase, FIKK family	FIKK3	23.577	0.7353	5.6566	1.1224	0.4199	0.3701	1.5266	0.129	-3.073		Host targeted
PF3D7_1038700	Plasmodium exported protein, unknown function	N/A	8.8676	0.8053	4.0271	0.2713	70.8766	52.1829	1.2919	0.13	-2.943		Host targeted
PF3D7_1302000	EMP1-trafficking protein	PTP6	253.355	425.587	64.7635	29.7354	9.4862	2.9937	17.8803	0.131	-3.067		Host targeted
PF3D7_0424900	Plasmodium exported protein (PHISTa), unknown function	N/A	260.725	3.0711	3.8634	0	0.5162	2.9581	3.2843	0.131	-3.07		Host targeted
PF3D7_0935700	Plasmodium exported protein, unknown function	N/A	32.6212	21.2205	6.7256	5.1811	1.2336	23.4574	67.266	0.131	-3.113		Host targeted
PF3D7_0220600	Plasmodium exported protein (hyp9), unknown function	N/A	27.0978	92.74	33.9844	3.0344	6.9745	3.2884	4.1272	0.132	-3.046		Host targeted
PF3D7_1038600	Plasmodium exported protein, unknown function	N/A	4.7601	0.3564	1.4798	0	1.8363	8.4671	0	0.137	-2.751		Host targeted
PF3D7_1458000	cysteine proteinase falcipain 1	FP1	56.5283	50.3567	41.386	12.7189	9.0034	26.4733	27.0008	0.138	-3.008		Host targeted
PF3D7_0713000	rifin	RIF	3.1085	2.0565	0.4742	0	0.5281	0.4655	0	0.138	-2.76		Host targeted
PF3D7_1330700	GPI transamidase subunit PIG-U, putative	N/A	3.4682	2.1593	31.4193	10.5654	52.4096	57.708	83.064	0.143	-3.113		Host targeted
PF3D7_1108700	heat shock protein J2	Pfj2	161.502	271.778	474.022	606.474	87.8815	126.203	105.172	0.143	-3.27		Host targeted
PF3D7_1212100	peripheral plastid protein 1, putative	PPP1	4.7307	3.2151	12.1694	4.9072	5.246	28.6706	15.8518	0.143	-3.15		Host targeted
PF3D7_0401400	rifin	RIF	0.8435	0.4004	0.3324	0	0.111	0.2937	0	0.145	-2.706		Host targeted
PF3D7_0808900	rifin	RIF	9.2998	49.5271	18.8634	0.2942	1.1008	1.0673	14.0053	0.148	-3.069		Host targeted
PF3D7_1478100	Plasmodium exported protein (hyp13), unknown function	N/A	9.9617	2.1314	3.5393	1.9752	14.0419	62.0186	15.0444	0.149	-3.159		Host targeted
PF3D7_1039900	exported protein family 4	EPF4	0	0	0	0	0	0	0	0.149	-2.751		Host targeted
PF3D7_0101100	exported protein family 4	EPF4	0	0	0	0	0	0	0	0.151	-2.77		Host targeted
PF3D7_0324300	exported protein family 4	EPF4	0	0.0852	0	0	0	0	0	0.151	-2.817		Host targeted
PF3D7_0631600	exported protein family 4	EPF4	0	0	0	0	0	0	0	0.151	-2.727		Host targeted
PF3D7_0935500	Plasmodium exported protein, unknown function	GEXP22	15.786	5.6576	88.8636	34.1174	32.2064	99.3111	61.091	0.155	-3.238		Host targeted
PF3D7_1480000	rifin	RIF	1.4285	1.4726	0	0	0.1074	0	0	0.156	-2.839		Host targeted
PF3D7_1221700	FbpA domain protein, putative	N/A	3.6547	8.9065	8.253	2.2509	2.4865	4.5604	3.5718	0.159	-3.294		Host targeted
PF3D7_1106100	ribosomal protein S15, apicoplast, putative	N/A	4.5105	6.7544	26.7191	7.257	72.9063	221.877	62.1837	0.169	0		Host targeted
PF3D7_1034800	conserved protein, unknown function	N/A	3.0975	3.2939	12.1279	2.9071	37.3094	46.0233	6.9195	0.169	-3.102		Host targeted
PF3D7_1301200	GBPH2 protein	GBPH2	2.4854	0.4894	0.2177	0.5183	0.2909	0.1709	0	0.169	-2.687		Host targeted
PF3D7_1254200	rifin	RIF	0.8896	1.0512	0.0779	0	0	0.0917	0	0.17	-2.729		Host targeted
PF3D7_0301400	Plasmodium exported protein, unknown function	N/A	2.8521	13.1068	16.7504	2.8106	7.9623	38.9336	0	0.171	-2.773		Host targeted
PF3D7_0732400	rifin	RIF	2.3621	5.7967	0.1432	1.2789	0.0957	0.253	0	0.176	-2.477		Host targeted
PF3D7_1234400	microgamete surface protein MiGS, putative	MiGS	4.8725	0.5632	0.501	0.1491	7.588	20.9021	2.8394	0.176	-2.691		Host targeted
PF3D7_0936600	gametocyte exported protein 5	GEXP5	69.4753	23.4147	9.757	0.3287	155.976	455.516	82.9464	0.178	-3.293		Host targeted
PF3D7_1254300	stevor	N/A	0.4593	0.2616	0.0905	0	0.2419	0	0	0.179	-2.634		Host targeted
PF3D7_0701800	rifin	RIF	3.3538	0.9553	0.1652	0	0.4416	0.8759	2.8095	0.182	-2.75		Host targeted
PF3D7_0114500	Plasmodium exported protein (hyp10), unknown function	N/A	0.9404	8.3338	0.9884	0	2.6419	18.6304	0	0.184	-1.528		Host targeted
PF3D7_0106000	conserved protein, unknown function	N/A	5.8433	3.8657	27.1331	22.7146	1.7871	14.3532	21.2219	0.188	-2.706		Host targeted
PF3D7_1477300	Plasmodium exported protein (PHIST), unknown function	Pfg14-744	1.6097	0.1881	0.5857	1.0459	36.2654	8.1643	11.6179	0.191	-2.786		Host targeted
PF3D7_1150200	rifin	RIF	2.0528	0.3118	0.2427	0	0.1081	0.1906	0	0.194	-2.634		Host targeted
PF3D7_0201500	Plasmodium exported protein (hyp9), unknown function	N/A	1.3645	0.1036	4.8406	0	8.4813	12.2913	10.9735	0.196	-2.845		Host targeted
PF3D7_0101600	rifin	RIF	2.7272	4.286	0.8154	0.2647	0.8916	0.4366	0	0.199	-2.872		Host targeted
PF3D7_0402000	Plasmodium exported protein (PHISTa), unknown function	N/A	25.3062	415.554	190.861	9.3631	26.6595	7.08	23.9168	0.202	-2.787		Host targeted
PF3D7_0100800	rifin	RIF	1.6137	1.0725	0	0	0	0.3746	0	0.206	-2.632		Host targeted
PF3D7_0731300	Plasmodium exported protein (PHISTb), unknown function	PfG174	19.5864	20.5292	30.1043	0.6161	0.9221	1.6257	5.8663	0.21	-2.693		Host targeted
PF3D7_0800500	rifin	RIF	3.7017	2.6711	0.6565	0.2605	1.8523	0.6015	0	0.211	-2.696		Host targeted
PF3D7_0201700	DnaJ protein, putative	N/A	15.8725	0.2053	0.1217	0	0.2034	0.5379	6.2114	0.214	-2.696		Host targeted
PF3D7_0901300	rifin	RIF	2.0198	7.3921	0.2895	1.0339	0.0967	0.0852	0	0.217	-2.492		Host targeted
PF3D7_0422000	steroid dehydrogenase, putative	N/A	4.5386	4.5965	15.1633	1.217	48.3824	186.247	66.6254	0.22	-2.969		Host targeted
PF3D7_1401200	Plasmodium exported protein, unknown function	N/A	9.1914	202.167	120.279	19.594	4.0115	2.5605	21.1189	0.225	-2.873		Host targeted
PF3D7_0219900	Plasmodium exported protein, unknown function	N/A	48.0516	5.2631	5.581	0.4241	1.7455	42.8032	4.0379	0.228	-3.439		Host targeted
PF3D7_1102500	gametocyte exported protein 2	GEXP02	4.7322	0.6766	11.016	0.1567	5.8064	8.2202	44.7722	0.234	-2.787		Host targeted
PF3D7_1430200	plasmepsin IX	PMIX	21.6644	2.0201	96.0496	246.798	75.7068	58.8103	153.726	0.238	-2.729		Host targeted
PF3D7_0901800	Plasmodium exported protein, unknown function	N/A	4.2528	9.2995	17.7788	3.2656	0.6788	0.718	3.4546	0.241	-2.628		Host targeted
PF3D7_0719800	conserved protein, unknown function	N/A	8.0475	9.3728	18.307	18.9898	5.006	31.6717	13.3544	0.243	-3.54		Host targeted
PF3D7_0200700	rifin	RIF	0.7358	0.6387	0	0.2959	0.1107	0	0	0.243	-2.818		Host targeted
PF3D7_0207000	merozoite surface protein 4	MSP4	19.2461	11.4241	869.329	2589.22	246.796	89.3617	263.085	0.251	-2.64		Host targeted
PF3D7_0631900	stevor	N/A	1.1446	1.6518	1.2632	0	0.2411	0.1062	0	0.254	-2.854		Host targeted
PF3D7_0113900	CX3CL1-binding protein 1	CBP1	72.159	22.0974	6.7451	1.2045	16.9763	101.307	43.9618	0.256	-2.691		Host targeted
PF3D7_0222800	stevor	N/A	3.4225	0.6932	0.1798	0	0	0.2118	0	0.256	-2.511		Host targeted
PF3D7_0825300	SAYSvFN domain-containing protein, putative	N/A	4.6706	2.6607	13.9912	3.2875	60.5206	1120.74	156.503	0.258	-3.275		Host targeted
PF3D7_1040200	stevor	N/A	3.4113	5.787	2.5099	0	0.7187	0.4223	0	0.26	-2.605		Host targeted
PF3D7_1373000	rifin	RIF	1.5487	0.0784	0.1627	0	0.2175	0.2876	0	0.261	-2.712		Host targeted
PF3D7_1149900	stevor	N/A	2.1395	0.7698	1.3315	0	0.4745	0.2091	0	0.27	-2.556		Host targeted
PF3D7_0300900	stevor	N/A	0.6414	0.1217	0.3792	0	0.1689	0.7445	0	0.274	-2.663		Host targeted
PF3D7_0500400	rifin	RIF	3.062	1.5505	0.3657	2.6125	0.391	0.6031	0	0.282	-2.591		Host targeted
PF3D7_1040300	rifin	RIF	1.4689	0.1394	0.9408	0	0.2901	0.341	0	0.295	-2.484		Host targeted
PF3D7_0726700	conserved Plasmodium protein, unknown function	N/A	3.8662	4.3277	30.9593	3.4375	126.906	228.642	117.276	0.308	-3.436		Host targeted
PF3D7_1200900	Plasmodium exported protein (PHISTc), unknown function	N/A	27.275	37.1676	13.0008	9.4398	3.4365	15.4829	9.7162	0.31	-2.581		Host targeted
PF3D7_0301800	Plasmodium exported protein, unknown function	N/A	74.5822	6.249	14.0341	1.5189	1.5628	0.6262	10.8459	0.32	-2.725		Host targeted
PF3D7_1477100	Plasmodium exported protein (hyp6), unknown function	N/A	2.6766	1.0843	1.8286	0	0	0.4971	0	0.331	-2.671		Host targeted
PF3D7_0115100	Plasmodium exported protein (PHISTa), unknown function	N/A	0.1183	0	0.0933	0	0	1.3188	0	0.338	-1.693		Host targeted
PF3D7_0220200	Plasmodium exported protein, unknown function	N/A	212.429	622.938	186.708	20.027	4.0504	9.283	43.8034	0.339	-3.604		Host targeted
PF3D7_1400700	stevor	N/A	2.1303	0.4494	0.1866	0	0.2493	0	1.5863	0.339	-2.3		Host targeted
PF3D7_0900300	rifin	RIF	2.803	0.5139	1.2191	1.0885	0.3054	0.4487	0	0.34	-2.394		Host targeted
PF3D7_0223400	rifin	RIF	7.3199	0.4029	8.112	0	2.3469	0.591	0	0.344	-2.339		Host targeted
PF3D7_1001300	Plasmodium exported protein (PHISTa), unknown function	N/A	3.9909	0.7578	6.0956	0.3511	0	0.2316	0	0.345	-2.923		Host targeted
PF3D7_1001000	chondroitin sulfate A ligand	CSA-L	11.8486	68.0125	15.6068	1.2668	2.528	4.4568	0	0.359	-2.235		Host targeted
PF3D7_1200500	rifin	RIF	24.4512	38.2882	1.4827	3.9717	2.4768	1.9212	5.0419	0.381	-2.617		Host targeted
PF3D7_0202100	liver stage associated protein 2	LSAP2	23.7715	27.7387	21.4553	5.4966	0.7258	2.3461	32.3232	0.383	-2.163		Host targeted
PF3D7_1148700	Plasmodium exported protein (PHISTc), unknown function	GEXP12	129.524	115.695	16.118	0.7922	47.1302	11.4965	11.3137	0.386	-2.739		Host targeted
PF3D7_0632000	rifin	RIF	1.1254	1.6385	0.3696	0.264	0.0988	0.1741	0	0.386	-2.526		Host targeted
PF3D7_0611000	SNARE associated Golgi protein, putative	N/A	2.8996	0.1835	10.6673	5.1026	18.3284	325.591	17.813	0.393	-0.763		Host targeted
PF3D7_1040700	rifin	RIF	1.306	1.0628	0	0	0.0982	0.0866	0	0.394	-2.695		Host targeted
PF3D7_1102600	Plasmodium exported protein, unknown function	GEXP14	3.1981	0.3886	0.8067	0	3.2344	2.7322	0	0.399	-2.549		Host targeted
PF3D7_0401300	rifin	RIF	3.9793	13.426	1.1672	3.6478	0.1949	0.3437	0	0.408	-2.476		Host targeted
PF3D7_0200600	rifin	RIF	0.5552	6.0452	0.2918	1.5633	0.3899	0.0859	0	0.408	-2.486		Host targeted
PF3D7_0632400	rifin	RIF	5.7072	1.0488	12.6266	0.5183	1.2606	0.2564	1.2338	0.416	-2.446		Host targeted
PF3D7_1200200	rifin	RIF	14.7814	34.729	11.5076	2.3264	1.6442	1.4493	0	0.422	-2.598		Host targeted
PF3D7_0413300	rifin	RIF	6.6182	2.8182	0.8695	0.2823	1.162	0.838	0	0.432	-2.453		Host targeted
PF3D7_0201000	rifin	RIF	0.5558	1.2666	0	0	0	0.1032	0	0.438	-2.425		Host targeted
PF3D7_1300200	rifin	RIF	6.3809	2.4234	14.5404	0	1.2604	1.3887	0	0.443	-2.547		Host targeted
PF3D7_1255100	rifin	RIF	3.6679	3.3885	0.547	0	0.5221	0.092	0	0.453	-2.58		Host targeted
PF3D7_0107700	dolichyl-diphosphooligosaccharide--protein glycosyltransferase subunit OST3/OST6, putative	N/A	2.0239	0.7686	6.8115	1.0958	12.8749	83.2022	36.5172	0.479	-1.084		Host targeted
PF3D7_1479400	rifin	RIF	2.6097	16.9594	0.1523	1.0885	0.2036	0.2692	11.6594	0.5	-2.582		Host targeted
PF3D7_0101800	stevor	N/A	0.7199	0.6379	0	0	0	0	0	0.513	-2.311		Host targeted
PF3D7_0833200	rifin	RIF	1.1696	0.148	0.6915	0.2744	0	0.0905	0	0.522	0		Host targeted
PF3D7_0831300	Plasmodium exported protein, unknown function	GEXP13	3.4288	2.2507	4.3047	0.4767	13.8689	56.7233	192.906	0.529	-2.522		Host targeted
PF3D7_1101300	rifin	RIF	2.4178	8.464	0.9944	0.8879	0.5537	0.2928	0	0.543	-2.706		Host targeted
PF3D7_1300500	rifin	RIF	2.3057	0.2388	0.0826	0	0.7728	0.4866	1.4047	0.547	-2.619		Host targeted
PF3D7_1001900	Plasmodium exported protein (hyp16), unknown function	PfJ23	85.5455	5.1524	7.724	1.7684	0.397	0.6999	1.6836	0.551	-3.082		Host targeted
PF3D7_0112800	Plasmodium exported protein (hyp11), unknown function	N/A	8.1873	0.2591	5.6474	0	13.1173	140.02	32.0063	0.559	-2.078		Host targeted
PF3D7_0200500	rifin	RIF	0	0.9261	0	0.264	0.0988	0	0	0.561	-2.232		Host targeted
PF3D7_0300400	stevor	N/A	1.2887	0.3559	0.277	0	0	0	0	0.561	-2.368		Host targeted
PF3D7_0200200	rifin	RIF	4.8818	8.2841	1.0644	2.9244	8.535	1.2539	0	0.565	-2.598		Host targeted
PF3D7_0500900	serine/threonine protein kinase, FIKK family	FIKK5	4.3422	1.6271	14.3313	13.53	3.0496	2.6344	1.552	0.584	-3.095		Host targeted
PF3D7_0700400	stevor	N/A	1.5028	0.2634	0.0911	0	0	0.322	0	0.587	-3.049		Host targeted
PF3D7_0631800	rifin	RIF	3.0433	2.0805	0.1599	0	0.2137	0.2826	0	0.613	-2.392		Host targeted
PF3D7_0900400	rifin	RIF	2.2253	0.2304	0.8771	0	0.959	2.4422	0	0.62	-2.57		Host targeted
PF3D7_1016700	Plasmodium exported protein (PHISTc), unknown function	N/A	43.5474	15.7437	6.4367	0.3536	0.4411	3.6161	24.1326	0.631	-2.52		Host targeted
PF3D7_1300900	stevor	N/A	1.3513	0.5987	0.1775	0	0	0.1045	0	0.64	-2.228		Host targeted
PF3D7_1101700	Pfmc-2TM Maurer's cleft two transmembrane protein	MC-2TM	0.1499	0.2278	0	0	0	0.2785	2.0102	0.643	-2.954		Host targeted
PF3D7_1104100	syntaxin, Qa-SNARE family	SYN13	66.6924	19.367	25.9326	5.0674	32.654	57.4749	9.3811	0.643	-2.567		Host targeted
PF3D7_1372700	rifin	RIF	2.0937	11.8141	0.3143	0.2807	0	0	0	0.647	-2.358		Host targeted
PF3D7_0500500	rifin	RIF	1.9081	0.341	0.3539	0	1.0642	0.2084	0	0.647	-2.263		Host targeted
PF3D7_0222700	rifin	RIF	1.6949	1.1359	0.2357	0.5614	0	0.0925	0	0.647	-2.297		Host targeted
PF3D7_0401000	rifin	RIF	1.1224	0.2557	0.0884	0	0.2364	0.4169	0	0.647	-2.308		Host targeted
PF3D7_0901000	rifin	RIF	0.6734	0.682	0.0884	0	0.2364	0.1042	0	0.647	-2.387		Host targeted
PF3D7_0202200	EMP1-trafficking protein	PTP1	103.671	9.7183	7.0696	0.3366	0.8817	1.6655	9.616	0.65	-3.049		Host targeted
PF3D7_1040900	rifin	RIF	2.2305	0.0847	0.1758	0	0.1174	0.3106	0	0.659	-2.613		Host targeted
PF3D7_0601200	Pfmc-2TM Maurer's cleft two transmembrane protein	MC-2TM	0	1.7995	0.4668	0	0	0	9.9229	0.668	-2.11		Host targeted
PF3D7_0201400	Plasmodium exported protein (hyp10), unknown function	N/A	0.8865	0	0	0	0	0.4116	0	0.673	-2.309		Host targeted
PF3D7_0222500	rifin	RIF	0.9879	3.2516	0.3461	0	0.1156	0.2038	0	0.691	-2.535		Host targeted
PF3D7_0832600	stevor	N/A	1.9695	0.4986	0.0862	0	0.2305	0.2032	0	0.696	-2.63		Host targeted
PF3D7_0717000	conserved Plasmodium membrane protein, unknown function	N/A	1.9783	1.1491	29.3568	6.8808	42.5415	69.9198	68.6308	0.703	-2.707		Host targeted
PF3D7_0101000	rifin	RIF	2.1323	0.4417	0.1528	0	0.1021	0.09	0	0.703	-2.524		Host targeted
PF3D7_0112100	PIMMS1 protein	PIMMS1	1.6973	0.6446	0	0	0.447	3.3494	949.818	0.754	-2.189		Host targeted
PF3D7_0115200	rifin	RIF	4.0548	16.0444	0.3716	0.2655	0.596	0.1751	0	0.754	-2.168		Host targeted
PF3D7_1300700	rifin	RIF	2.1629	1.9287	0.2224	0	0.8916	0.3493	0	0.758	-2.21		Host targeted
PF3D7_1150000	rifin	RIF	1.4106	0.5	0.1482	0	0	0	0	0.758	-2.244		Host targeted
PF3D7_0937300	rifin	RIF	4.1156	0.071	0.8848	0	0.6897	1.216	2.5074	0.769	-2.348		Host targeted
PF3D7_1372300	Plasmodium exported protein (PHISTa-like)	N/A	52.4462	3.9581	1.8551	0	0.3541	1.717	0	0.771	-2.717		Host targeted
PF3D7_1253700	rifin	RIF	2.221	0.0702	0.1459	0	0	0.3437	0	0.786	-2.349		Host targeted
PF3D7_0413200	rifin	RIF	5.0763	2.3135	0.2182	0.5197	0.1944	0.1714	0	0.79	-2.403		Host targeted
PF3D7_0632200	rifin	RIF	2.5774	2.7968	0.2177	1.0367	0.1939	0.0854	0	0.794	-2.092		Host targeted
PF3D7_0631500	exported protein family 3	EPF3	0.1506	0	0	0	0	0.1398	0	0.795	-2.843		Host targeted
PF3D7_0831500	Plasmodium exported protein (PHIST), unknown function	N/A	109.98	95.1806	12.9804	3.2073	1.8546	3.8466	0	0.795	-3.036		Host targeted
PF3D7_0101200	exported protein family 3	EPF3	0	0	0	0	0	0	0	0.795	-2.494		Host targeted
PF3D7_0222200	exported protein family 3	EPF3	0.1506	0	0	0	0	0	0	0.795	-2.999		Host targeted
PF3D7_0324200	exported protein family 3	EPF3	0	0	0	0	0.1586	0.1398	0	0.795	-1.67		Host targeted
PF3D7_0701500	exported protein family 3	EPF3	0	0	0	0	0	0	0	0.795	-2.678		Host targeted
PF3D7_1039800	exported protein family 3	EPF3	0	0.1144	0	0	0	0	0	0.795	-2.707		Host targeted
PF3D7_1101600	exported protein family 3	EPF3	0	0	0	0	0	0	0	0.795	-2.761		Host targeted
PF3D7_0713100	Pfmc-2TM Maurer's cleft two transmembrane protein	MC-2TM	6.2992	37.7088	3.3105	0.4222	0.474	1.1142	0	0.802	0.52		Host targeted
PF3D7_1400400	rifin	RIF	2.5736	0.9383	0.1623	0	0	0	0	0.804	-2.149		Host targeted
PF3D7_1254400	rifin	RIF	2.1976	4.9382	0.2165	0.5156	0.0964	0.17	0	0.804	-2.353		Host targeted
PF3D7_0402400	Plasmodium exported protein, unknown function	GEXP18	512.252	1302.34	221.701	376.897	60.2322	388.254	73.1573	0.813	-2.989		Host targeted
PF3D7_0220300	Plasmodium exported protein, unknown function	N/A	11.1085	138.108	35.801	0.9199	8.4327	4.551	0	0.817	-2.119		Host targeted
PF3D7_1300400	rifin	RIF	0.9103	0.3841	0.0797	0	0.1065	0.0939	0	0.831	-2.199		Host targeted
PF3D7_0900900	stevor	N/A	0.3468	0.9658	0	0	0	0.1073	0	0.831	-2.595		Host targeted
PF3D7_0401800	Plasmodium exported protein (PHISTb), unknown function	PfD80	156.179	7506.78	627.816	3275.98	63.5777	10.4827	29.0966	0.837	-2.347		Host targeted
PF3D7_1479900	stevor	N/A	1.7112	0.9532	0	0	0	0.2118	0	0.849	-2.363		Host targeted
PF3D7_0832900	stevor	N/A	3.1943	0.3466	0.8993	0.3212	0	0.3178	0	0.849	-2.411		Host targeted
PF3D7_0832400	stevor	N/A	3.1943	3.0329	0.4496	0	0.1201	0.6356	0	0.849	-2.319		Host targeted
PF3D7_0201300	stevor	N/A	0.4548	2.5048	0	0	0.1197	0.1055	0	0.853	-2.121		Host targeted
PF3D7_1254500	rifin	RIF	2.2668	0.5165	0.0893	0.3191	0	0.421	0	0.858	-2.09		Host targeted
PF3D7_0410000	erythrocyte vesicle protein 1	EVP1	24.7827	60.2763	50.6506	25.6085	4.659	10.7707	72.6967	0.859	-2.864		Host targeted
PF3D7_0221400	stevor	N/A	1.2427	0.5148	0	0	0.119	0.3147	0	0.861	-2.451		Host targeted
PF3D7_0425100	Plasmodium exported protein (hyp6), unknown function	N/A	21.9586	0.2566	0	0	0	0.4705	0	0.866	-2.541		Host targeted
PF3D7_1201200	Plasmodium exported protein (PHISTa-like), unknown function	N/A	148.118	7.2623	14.3329	1.3239	0.9907	5.6764	60.9232	0.873	-2.551		Host targeted
PF3D7_1101200	rifin	RIF	0.4873	0.148	0.461	0.2744	0.1026	0	0	0.879	-2.031		Host targeted
PF3D7_0100600	rifin	RIF	1.5464	0.7341	0.3047	0.5442	1.9346	0.8975	1.2954	0.888	-2.239		Host targeted
PF3D7_0632300	rifin	RIF	2.9963	0.2202	0.4571	0.2721	0.1018	0.0897	0	0.888	-2.14		Host targeted
PF3D7_1401300	epoxide hydrolase 2	EH2	8.5888	4.5723	5.7869	0.62	2.32	10.907	1.9678	0.891	-3.073		Host targeted
PF3D7_1464400	zinc finger protein, putative	N/A	54.3481	107.735	104.496	99.8364	144.184	132.942	31.0918	0.894	-2.018		Host targeted
PF3D7_0301700	EMP1 trafficking protein PTP7	PTP7	12.6928	223.079	125.42	14.7879	6.4552	6.7063	5.8663	0.898	-2.273		Host targeted
PF3D7_0324500	rifin	RIF	1.9695	0.9973	0.2587	0	0.1152	0.2032	0	0.898	-2.014		Host targeted
PF3D7_0900600	rifin	RIF	1.5128	0.6463	0.4472	0.7986	0.7968	0.878	0	0.91	-2.123		Host targeted
PF3D7_0712600	erythrocyte membrane protein 1, PfEMP1	VAR	34.4034	10.0067	0.9655	1.4589	1.4391	2.0268	11.1543	0.913	-2.227		Host targeted
PF3D7_1100400	rifin	RIF	0.9665	7.9943	0.5079	2.1166	0	0.1994	0	0.916	-1.162		Host targeted
PF3D7_1000400	rifin	RIF	1.403	20.3911	0.5161	0.79	0	0.0868	0	0.92	-1.813		Host targeted
PF3D7_0600500	rifin	RIF	2.612	3.6137	2.2797	0	0.3931	0.3465	0	0.922	-2.04		Host targeted
PF3D7_0902300	serine/threonine protein kinase, FIKK family	FIKK9.4	73.0202	19.0958	5.495	0	2.6484	11.6727	6.8922	0.926	-2.806		Host targeted
PF3D7_0900200	rifin	RIF	9.5066	2.2434	4.2928	0	2.2363	0.5999	1.237	0.931	-2.356		Host targeted
PF3D7_0102300	Plasmodium exported protein, unknown function	N/A	4.1283	6.2716	45.0972	14.1143	12.426	9.0364	3.9523	0.932	-1.688		Host targeted
PF3D7_0936500	virulence-associated protein 1	VAP1	3.0781	0.5082	0.211	0	40.8864	119.307	3.5875	0.933	-2.829		Host targeted
PF3D7_0617700	rifin	RIF	4.5067	0.1592	0.7435	0	1.4353	0.5839	0	0.935	-2.125		Host targeted
PF3D7_0115600	rifin	RIF	11.1713	4.5209	4.6198	0	2.3151	0.9353	0	0.936	-2.159		Host targeted
PF3D7_0221200	Plasmodium exported protein (hyp15), unknown function	N/A	4.5386	20.4292	24.5149	0.9465	0.177	0.6243	0	0.94	-2.907		Host targeted
PF3D7_0900500	rifin	RIF	2.0528	0.3898	4.774	0	12.6514	18.4913	1.3757	0.949	-2.099		Host targeted
PF3D7_1400500	rifin	RIF	1.6374	1.2437	0.242	0	0	0.19	0	0.95	-2.76		Host targeted
PF3D7_0113300	Plasmodium exported protein (hyp1), unknown function	N/A	144.121	10.0299	10.9721	1.1722	1.6291	5.9653	4.7833	0.952	-2.159		Host targeted
PF3D7_1016400	serine/threonine protein kinase, FIKK family	FIKK10.1	94.6338	120.106	60.3466	6.7454	12.0186	8.5812	4.5873	0.953	-2.76		Host targeted
PF3D7_1400300	rifin	RIF	1.3188	0.8476	0	0	0	0	0	0.955	-2.191		Host targeted
PF3D7_0731700	Plasmodium exported protein (hyp9), unknown function	N/A	6.7119	15.0263	34.253	8.9516	1.3025	1.4761	0	0.957	-2.381		Host targeted
PF3D7_1301700	CX3CL1-binding protein 2	CBP2	628.875	285.899	36.3507	2.7877	12.3679	4.0718	28.4376	0.957	-2.1		Host targeted
PF3D7_1476300	Plasmodium exported protein (PHISTb), unknown function	N/A	4.858	0.5073	51.9882	40.1797	3.3266	38.4025	90.3454	0.963	-1.328		Host targeted
PF3D7_1201000	Plasmodium exported protein (PHISTb), unknown function	N/A	43.6812	608.625	101.039	4.1944	3.5872	2.3715	20.6803	0.967	-2.448		Host targeted
PF3D7_0324600	stevor	N/A	1.1521	0	0	0	0	0	0	0.967	-2.076		Host targeted
PF3D7_0831400	Plasmodium exported protein, unknown function	N/A	32.6141	545.006	85.912	1.94	1.9356	2.7726	18.4704	0.969	-0.655		Host targeted
PF3D7_1373300	rifin	RIF	3.9206	0.7445	0.4636	0.8279	0.2065	0.182	0	0.97	-1.903		Host targeted
PF3D7_0425500	stevor	N/A	1.2549	11.5253	0.2698	0.3212	0.2403	0.3178	0	0.971	-1.847		Host targeted
PF3D7_1252500	Plasmodium exported protein, unknown function	N/A	1.7618	0.3345	1.3194	0.496	13.6419	29.5309	0	0.975	-2.692		Host targeted
PF3D7_0937400	rifin	RIF	2.1264	2.8632	1.9048	11.4298	1.5273	0.6282	2.5909	0.975	-2.156		Host targeted
PF3D7_1000600	rifin	RIF	4.9983	77.1736	8.5624	2.4357	0.6075	0.714	0	0.976	0		Host targeted
PF3D7_1040100	rifin	RIF	4.4898	5.3713	0.2654	0.632	0.2364	0.4169	0	0.976	-2.193		Host targeted
PF3D7_0421100	erythrocyte membrane protein 1, PfEMP1	VAR	8.1169	9.9325	0.2262	1.2571	0.1847	0.3109	1.0686	0.978	-2.103		Host targeted
PF3D7_0501000	Plasmodium exported protein, unknown function	N/A	89.4565	571.645	207.356	12.7624	90.0269	12.0087	14.2951	0.979	-0.91		Host targeted
PF3D7_0732200	rifin	RIF	3.2236	1.0082	1.1958	1.0677	0.0998	0.176	0	0.98	-2.126		Host targeted
PF3D7_0301300	epoxide hydrolase 1	EH1	12.3931	10.4393	3.6949	0.4473	0.5021	0.7377	0	0.981	-1.86		Host targeted
PF3D7_1016800	Plasmodium exported protein (PHISTc), unknown function	N/A	54.7899	3.1884	9.2305	2.4881	3.9566	19.4899	32.5724	0.981	-2.893		Host targeted
PF3D7_0300700	rifin	RIF	3.0175	16.2593	0.1486	1.062	0	0	0	0.982	-2.016		Host targeted
PF3D7_0532900	rifin	RIF	8.1808	1.2428	5.4172	0	0.2298	0.2025	0	0.984	-1.988		Host targeted
PF3D7_0113400	Plasmodium exported protein, unknown function	N/A	3.9467	0.5506	0.5079	0.2267	4.4972	5.7593	23.7507	0.987	-2.317		Host targeted
PF3D7_1373400	rifin	RIF	23.0132	1.748	7.4743	0.7775	1.2606	0.7693	0	0.987	-2.172		Host targeted
PF3D7_0114700	rifin	RIF	5.0475	1.4683	0.7619	0	0.1131	0	0	0.987	-2.356		Host targeted
PF3D7_0632100	rifin	RIF	0.2147	0	0	0	0	0	0	0.987	-2.152		Host targeted
PF3D7_0501200	parasite-infected erythrocyte surface protein	PIESP2	53.853	735.72	351.899	26.1094	5.6464	2.054	10.2625	0.988	-2.573		Host targeted
PF3D7_0701600	Pfmc-2TM Maurer's cleft two transmembrane protein	MC-2TM	1.4744	18.0308	1.046	0	0.1553	0.6845	0	0.988	-0.239		Host targeted
PF3D7_0420900	erythrocyte membrane protein 1, PfEMP1	VAR	1.2957	0.384	0.0498	0.2669	0.0332	0.0586	0	0.99	-2.016		Host targeted
PF3D7_1476600	Plasmodium exported protein, unknown function	N/A	2.8026	0.5805	3.5579	0.1024	4.6779	8.8892	55.1262	0.992	-1.994		Host targeted
PF3D7_0104400	4-hydroxy-3-methylbut-2-enyl diphosphate reductase	LytB	7.2058	15.582	48.9241	17.9124	26.9455	53.5925	180.982	0.993	-2.596		Host targeted
PF3D7_0731200	Plasmodium exported protein, unknown function	N/A	34.796	0.682	7.9636	0.316	0.4729	1.0423	0	0.993	-1.571		Host targeted
PF3D7_1478800	Plasmodium exported protein, unknown function	N/A	7.8684	3.8516	2.0676	0.9846	0.5526	1.2989	4.6872	0.993	-2.391		Host targeted
PF3D7_0101900	rifin	RIF	2.8322	0.6914	3.9869	13.1006	0.2131	0.0939	0	0.994	-2.047		Host targeted
PF3D7_0112900	Plasmodium exported protein, unknown function	N/A	11.2304	3.496	3.0478	2.5918	2.5213	17.2673	24.676	0.995	-2.003		Host targeted
PF3D7_0936800	Plasmodium exported protein (PHISTc), unknown function	N/A	715.675	149.496	57.575	0.7653	14.4145	4.039	20.6469	0.996	-1.879		Host targeted
PF3D7_1039000	serine/threonine protein kinase, FIKK family	FIKK10.2	59.9984	547.692	17.6166	1.2862	1.2833	2.6867	3.5718	0.996	-0.296		Host targeted
PF3D7_1253000	gametocyte erythrocyte cytosolic protein	GECO	190.416	2.1931	39.1027	0.4168	1.7938	3.6437	8.9306	0.996	0.903		Host targeted
PF3D7_0301600	Plasmodium exported protein (hyp1), unknown function	GEXP21	52.1228	82.9689	18.2619	1.6038	3.3006	6.7004	19.0877	0.996	-2.439		Host targeted
PF3D7_1254100	stevor	N/A	1.8808	0.7143	0.278	0	0	0.3274	0	0.996	-1.922		Host targeted
PF3D7_0617600	stevor	N/A	2.7561	0.5233	7.6044	0	3.0244	0.3199	0	0.997	-2.16		Host targeted
PF3D7_0830600	Plasmodium exported protein (PHISTc), unknown function	N/A	133.093	29.3798	14.7655	2.3581	4.9731	15.8379	22.4514	0.997	-2.845		Host targeted
PF3D7_1254600	stevor	N/A	0.5741	0.4361	0	0	0	0.8531	0	0.997	-1.505		Host targeted
PF3D7_0300500	rifin	RIF	0.8699	0.5139	0.0761	0	0	0.0897	0	0.997	-2.175		Host targeted
PF3D7_0424600	Plasmodium exported protein (PHISTb)	N/A	86.9901	2.3019	27.0763	0	2.2467	1.6677	70.7089	0.998	-0.203		Host targeted
PF3D7_1016500	Plasmodium exported protein (PHISTc), unknown function	N/A	3.1262	0.7915	1.5	0	0.8591	4.039	3.6435	0.998	-2.69		Host targeted
PF3D7_0731100	EMP1-trafficking protein	PTP2	227.639	34.0242	25.2137	9.0163	1.1108	7.1805	20.4138	0.999	-2.299		Host targeted
PF3D7_0324100	Pfmc-2TM Maurer's cleft two transmembrane protein	MC-2TM	1.3498	16.9746	0.4729	0	0.158	0.4178	0	0.999	-2.453		Host targeted
PF3D7_0808600	erythrocyte membrane protein 1, PfEMP1	VAR	19.1792	6.1118	1.0531	1.3402	3.5912	2.1531	10.2907	0.999	-1.747		Host targeted
PF3D7_0830900	Plasmodium exported protein, unknown function	N/A	18.2093	48.2045	19.1869	9.1371	59.4486	246.109	106.324	0.999	-1.743		Host targeted
PF3D7_0901500	rifin	RIF	1.7112	15.4538	2.3982	0.2676	0.5007	0.1765	0	0.999	-2.799		Host targeted
PF3D7_0424000	Plasmodium exported protein (PHISTc), unknown function	N/A	18.7978	123.19	19.7844	3.0967	2.3173	1.0213	5.3606	0.999	1.309		Host targeted
PF3D7_0900700	rifin	RIF	1.1841	7.4724	0.1436	0	0.0959	0.2537	0	0.999	-1.807		Host targeted
PF3D7_0800600	Plasmodium exported protein (PHISTa), unknown function	N/A	0	0	0.0939	0	0	1.3279	0	0.999	-2.602		Host targeted
PF3D7_0300800	rifin	RIF	1.2967	0.082	0	0	0.1138	0.1003	0	0.999	-1.649		Host targeted
PF3D7_1372800	stevor	N/A	1.156	0.7024	0.2733	0	0	0.322	0	0.999	-1.6		Host targeted
PF3D7_1252700	Plasmodium exported protein (PHISTb), unknown function	N/A	27.235	15.6472	86.9132	41.2735	8.453	27.1537	2.0681	1	-0.617		Host targeted
PF3D7_0113700	heat shock protein 40, type II	HSP40	75.4633	33.7101	14.9062	0.7293	3.2745	6.735	130.771	1	-0.674		Host targeted
PF3D7_0219800	Plasmodium exported protein (PHISTc), unknown function	N/A	15.8756	6.2772	30.0876	9.797	4.6966	19.6902	8.7445	1	-2.084		Host targeted
PF3D7_1253100	Plasmodium exported protein (PHISTa), unknown function	N/A	46.1137	16.5532	11.5795	1.0169	3.932	4.4722	3.2275	1	0.505		Host targeted
PF3D7_1001700	Plasmodium exported protein (PHISTc), unknown function	N/A	67.1159	9.206	40.1694	41.0961	1.7847	3.0254	13.9738	1	-2.451		Host targeted
PF3D7_0500800	mature parasite-infected erythrocyte surface antigen	MESA	23.2781	395.018	280.993	3.8232	25.9535	12.3394	99.4506	1	-1.237		Host targeted
PF3D7_1016300	GBP130 protein	GBP130	489.338	270.39	1067.39	264.579	91.9753	7.0499	117.018	1	-1.841		Host targeted
PF3D7_0113200	Plasmodium exported protein, unknown function	N/A	11.8529	201.503	91.6347	23.1295	6.6761	11.3338	88.8713	1	-1.287		Host targeted
PF3D7_0201900	erythrocyte membrane protein 3	EMP3	9.6038	0.3788	1.4602	0	6.9951	2.1435	14.3236	1	-0.927		Host targeted
PF3D7_1478600	EMP1-trafficking protein	PTP3	4.3495	35.7353	5.8159	0.3875	0.464	0.5623	1.4758	1	-2.016		Host targeted
PF3D7_0113000	glutamic acid-rich protein GARP	GARP	548.631	2473.82	137.151	14.5356	43.4552	6.8555	86.4944	1	-2.159		Host targeted
PF3D7_1429600	conserved Plasmodium protein, unknown function	GEXP03	7.4337	8.4096	29.5499	22.2659	143.295	630.383	67.8367	1	-1.745		Host targeted
PF3D7_0532300	Plasmodium exported protein (PHISTb), unknown function	N/A	223.991	842.195	63.1972	1.9209	2.9469	1.8373	17.3748	1	0.751		Host targeted
PF3D7_0532400	lysine-rich membrane-associated PHISTb protein	LyMP	109.782	363.679	95.306	12.7787	1.8709	2.4432	20.2772	1	-1.218		Host targeted
PF3D7_1038800	RESA-like protein with PHIST and DnaJ domains	N/A	25.0287	2.1735	2.4362	0.4296	1.2058	4.287	2.0455	1	-2.763		Host targeted
PF3D7_0222100	Pfmc-2TM Maurer's cleft two transmembrane protein	MC-2TM	0.1512	0	0.1192	0	0.1593	0	4.0554	1	-0.777		Host targeted
PF3D7_0900100	erythrocyte membrane protein 1, PfEMP1	VAR	17.0686	8.0419	1.6305	1.6824	1.6464	0.5975	0.616	1	-2.085		Host targeted
PF3D7_1301400	Plasmodium exported protein (hyp12), unknown function	HYP12	37.5287	291.08	6.2472	1.5388	0.7676	1.3533	6.1044	1	-2.232		Host targeted
PF3D7_1401600	Plasmodium exported protein (PHISTb), unknown function	N/A	202.02	32.6654	216.407	186.123	28.4683	63.0055	67.1817	1	-1.412		Host targeted
PF3D7_0936200	Plasmodium exported protein (hyp11), unknown function	N/A	13.8823	87.2338	17.4814	1.0152	78.0619	328.815	26.5811	1	0.122		Host targeted
PF3D7_0902100	serine/threonine protein kinase, FIKK family	FIKK9.2	2.933	0.3037	6.8312	8.6333	0.2808	0.6809	0	1	-2.697		Host targeted
PF3D7_1102300	Plasmodium exported protein, unknown function	N/A	3.9312	14.9941	1.7143	0.471	6.4325	3.806	34.7541	1	-1.745		Host targeted
PF3D7_1476200	Plasmodium exported protein (PHISTb), unknown function	N/A	123.244	850.202	34.5418	3.2465	24.5093	10.4558	26.3644	1	0.233		Host targeted
PF3D7_1458300	alpha/beta hydrolase, putative	N/A	4.2328	0.7087	21.2948	17.3642	2.9728	7.9459	5.1853	1	-0.324		Host targeted
PF3D7_0324800	rifin	RIF	4.7704	4.6182	2.1383	0	1.0839	1.7372	0	1	-2.954		Host targeted
PF3D7_0100100	erythrocyte membrane protein 1, PfEMP1	VAR	23.267	6.803	2.8393	2.0372	2.1513	0.7465	1.0775	1	-1.706		Host targeted
PF3D7_0712800	erythrocyte membrane protein 1, PfEMP1	VAR	6.7417	7.8465	1.2	3.6301	0.3109	0.476	0.6246	1	-0.884		Host targeted
PF3D7_0421300	erythrocyte membrane protein 1, PfEMP1	VAR	31.8302	18.6602	0.9126	2.5006	2.6899	3.0633	19.3438	1	-1.121		Host targeted
PF3D7_0400100	erythrocyte membrane protein 1, PfEMP1	VAR	16.6421	23.1752	3.5337	2.1836	2.7142	0.7812	1.7619	1	-0.358		Host targeted
PF3D7_0202000	knob-associated histidine-rich protein	KAHRP	4190.93	77.8383	38.193	10.4701	229.623	29.1056	472.786	1	-1.359		Host targeted
PF3D7_1334600	MSP7-like protein	MSRP3	11.1719	0.7071	55.044	150.068	1.2259	16.7505	0	1	-2.12		Host targeted
PF3D7_1038500	Plasmodium exported protein, unknown function	N/A	2.5981	0.2819	1.9749	1.3062	5.865	24.1264	12.4367	1	0.78		Host targeted
PF3D7_0712000	erythrocyte membrane protein 1, PfEMP1	VAR	33.3436	62.232	41.4226	430.062	2.5769	2.8677	3.2785	1	0.169		Host targeted
PF3D7_0712300	erythrocyte membrane protein 1, PfEMP1	VAR	17.8889	6.2463	0.387	0.7775	1.1637	1.3677	1.645	1	-2.06		Host targeted
PF3D7_0600200	erythrocyte membrane protein 1, PfEMP1	VAR	6.1497	2.0189	0.5619	1.7348	0.5345	0.3365	0.3238	1	-0.779		Host targeted
PF3D7_1240900	erythrocyte membrane protein 1, PfEMP1	VAR	1380.18	153.187	49.4656	4.6672	3.8931	4.1661	17.1222	1	0.006		Host targeted
PF3D7_0100900	rifin	RIF	0.5948	1.6566	0.2344	0	0.2088	0.4602	0	1	1.011		Host targeted
PF3D7_1100200	erythrocyte membrane protein 1, PfEMP1	VAR	8.2371	1.156	1.0257	0.9486	0.9179	0.5718	0.7785	1	-2.315		Host targeted
PF3D7_0730900	EMP1-trafficking protein	PTP4	17.8677	190.146	12.1623	0.1392	0.4341	0.903	5.3022	1	-2.024		Host targeted
PF3D7_0412700	erythrocyte membrane protein 1, PfEMP1	VAR	237.554	33.531	5.7196	7.1391	0.8367	0.8652	23.9535	1	1.497		Host targeted
PF3D7_0711700	erythrocyte membrane protein 1, PfEMP1	VAR	101.248	7.1085	1.4977	2.0778	1.588	0.8602	3.1568	1	-2.042		Host targeted
PF3D7_1100100	erythrocyte membrane protein 1, PfEMP1	VAR	16.067	15.0373	3.845	2.8722	2.0822	0.6808	2.1364	1	-1.565		Host targeted
PF3D7_0420700	erythrocyte membrane protein 1, PfEMP1	VAR	7.3373	1.3135	0.586	1.001	0.2724	0.2551	4.3323	1	-1.925		Host targeted
PF3D7_1219300	erythrocyte membrane protein 1, PfEMP1	VAR	37.7098	50.8699	4.7276	3.1253	7.3411	2.7773	4.1327	1	0.67		Host targeted
PF3D7_0500100	erythrocyte membrane protein 1, PfEMP1	VAR	16.4209	28.0582	4.2859	6.3006	2.0586	0.9073	1.0561	1	-1.546		Host targeted
PF3D7_1479500	stevor	N/A	0.8119	0.5286	0.0914	0	0	0.1077	0	1	-0.274		Host targeted
PF3D7_1372100	Plasmodium exported protein (PHISTb), unknown function	GEXP04	3.5936	0.5632	0.2698	0	3.906	31.6236	23.7011	1	-0.007		Host targeted
PF3D7_1201400	Plasmodium exported protein, unknown function	N/A	5.2348	3.485	1.3593	0.0866	0.4217	2.0016	1.6508	1	-0.945		Host targeted
PF3D7_0808800	rifin	RIF	5.9037	1.3588	18.1928	0	0.8481	0.9967	0	1	1.505		Host targeted
PF3D7_0201800	knob associated heat shock protein 40	KAHsp40	19.8716	0.4384	0.975	0	1.3898	0.6891	4.4206	1	-2.465		Host targeted
PF3D7_1407800	plasmepsin IV	PM4	238.701	299.485	228.647	27.2139	38.6118	13.0685	40.4194	1	-0.823		Host targeted
PF3D7_1001400	exported lipase 1	XL1	80.3101	20.2957	6.9914	0.1062	0.3975	0.9111	3.0349	1	-2.633		Host targeted
PF3D7_1372000	Plasmodium exported protein (PHISTa), unknown function	N/A	12.0704	7.7141	1.7061	0.7031	1.4031	1.2368	2.2314	1	1.28		Host targeted
PF3D7_0424700	serine/threonine protein kinase, FIKK family	FIKK4.2	241.951	18.1965	15.857	0	2.128	2.5363	9.9148	1	0.721		Host targeted
PF3D7_1201100	RESA-like protein with PHIST and DnaJ domains	N/A	6.797	76.1228	2.4355	0.3262	0.6509	1.291	2.0704	1	-2.206		Host targeted
PF3D7_0102600	serine/threonine protein kinase, FIKK family	FIKK1	5.4041	29.5718	2.6517	0.1552	2.3818	4.7111	22.1732	1	-0.921		Host targeted
PF3D7_0702300	sporozoite threonine and asparagine-rich protein	STARP	52.8081	3.7757	1.6135	0.3293	0.2464	0.9775	4.7029	1	-0.119		Host targeted
PF3D7_1353100	Plasmodium exported protein, unknown function	N/A	241.261	609.746	38.0763	4.4531	14.7396	6.1009	6.5227	1	-0.31		Host targeted
PF3D7_1372200	histidine-rich protein III	HRPIII	19921.2	20181.5	1053.88	562.264	25.8988	29.0342	10.1386	1	-1.811		Host targeted
PF3D7_1200800	serine/threonine protein kinase, FIKK family	FIKK12	28.8537	14.1458	9.1273	1.0348	6.9699	18.1472	3.2843	1	-2.428		Host targeted
PF3D7_0726100	Plasmodium exported protein, unknown function	N/A	387.907	11.2756	8.8022	1.3403	4.5137	17.4823	20.8825	1	-2.417		Host targeted
PF3D7_0424500	serine/threonine protein kinase, FIKK family	FIKK4.1	99.8641	2.1636	1.7611	0	0.4707	4.616	0.7486	1	0.533		Host targeted
PF3D7_1149600	DnaJ protein, putative	N/A	192.619	21.8466	14.1946	1.3702	1.3329	2.4403	26.7433	1	-0.493		Host targeted
PF3D7_0936300	ring-exported protein 3	REX3	1502.08	303.019	44.9621	2.6964	20.4022	13.6363	49.9181	1	-0.924		Host targeted
PF3D7_0424800	Plasmodium exported protein (PHISTb), unknown function	N/A	47.2784	0.1678	0.6966	0	0.5818	1.0257	2.9611	1	-0.216		Host targeted
PF3D7_1002100	EMP1-trafficking protein	PTP5	365.909	104.383	54.6435	13.0213	1.392	0.818	17.7105	1	-2.618		Host targeted
PF3D7_0402100	Plasmodium exported protein (PHISTb), unknown function	N/A	70.0753	11.5173	22.2394	2.041	0.5091	0.7853	19.4324	1	-0.876		Host targeted
PF3D7_1149200	ring-infected erythrocyte surface antigen	RESA3	105.217	2.8101	56.2685	8.3512	1.5455	1.8362	114.991	1	-2.517		Host targeted
PF3D7_0413100	erythrocyte membrane protein 1, PfEMP1	VAR	0.9869	0.4656	0.0825	0.2105	0.0315	0.1388	0	1	-1.604		Host targeted
PF3D7_1149800	rifin	RIF	3.4243	0.1678	1.3932	0	0.2327	0.1025	0	1	-1.316		Host targeted
PF3D7_1400600	rifin	RIF	2.0801	0.7182	0.2236	0.5324	0.0996	0.2634	0	1	-2.232		Host targeted
PF3D7_1041000	rifin	RIF	2.6261	27.8551	0.3696	2.6407	0.1976	0.1741	1.257	1	-2.127		Host targeted
PF3D7_1019600	conserved Plasmodium protein, unknown function	N/A	3.0744	0.371	19.8648	21.6812	8.6269	96.0562	57.7676	1	-0.196		Host targeted
PF3D7_1300600	rifin	RIF	2.1118	0.3055	9.9097	0	74.7969	168.098	5.3916	1	-1.796		Host targeted
PF3D7_1401000	GBPH protein	GBPH	2.1465	0.429	1.603	0	0.238	0.1049	0	1	-2.446		Host targeted
PF3D7_0732000	stevor	N/A	1.4059	0.0889	0.1847	0	0	0	0	1	-1.564		Host targeted
PF3D7_1371700	serine/threonine protein kinase, FIKK family	FIKK13	2.5385	7.1954	8.8831	3.1378	1.6958	2.5872	0	1	-0.71		Host targeted
PF3D7_0402600	stevor	N/A	21.5458	119.724	9.3553	8.4345	0.2427	0.2139	0	1	-1.57		Host targeted
PF3D7_0115400	stevor	N/A	4.0326	2.2754	0.9082	0	0	0.4279	0	1	-2.412		Host targeted
PF3D7_0200400	stevor	N/A	0.3422	0.5199	0	0	0.1201	0	0	1	-1.003		Host targeted
PF3D7_0115300	rifin	RIF	3.4073	2.1959	0.5697	0.8721	0.2175	0.0958	0	1	0		Host targeted
PF3D7_0901600	stevor	N/A	1.8313	0.4347	1.7143	0	0.3617	0.6377	0	1	-2.338		Host targeted
PF3D7_1102200	erythrocyte cytoskeleton-interacting J protein	ECIJP	0.1841	0.1398	0.1935	0.3455	0.1293	0.4559	0	1	-0.651		Host targeted
PF3D7_0114200	exported protein family 3	EPF3	1.8997	0.3797	0.0788	0.2815	0.1053	0.3714	0	1	-1.199		Host targeted
PF3D7_0201600	PHISTb domain-containing RESA-like protein 1	RLP1	17.8276	0.2719	1.3545	0	2.0364	0.6648	7.677	1	-2.037		Host targeted
PF3D7_0631100	Plasmodium exported protein (PHISTb), unknown function	N/A	0.298	0.1131	0.0587	0	0.3139	0.4843	0	1	-1.78		Host targeted
PF3D7_0601500	Plasmodium exported protein (PHISTb), unknown function	N/A	0.0743	0.0564	0.1172	0	0.1566	0.3452	0	1	-1.422		Host targeted
PF3D7_1149300	serine/threonine protein kinase, FIKK family	FIKK11	4.962	1.7902	1.6624	0.5239	0.392	0.9791	1.6626	1	-2.749		Host targeted
PF3D7_0324400	rifin	RIF	2.9825	0.2265	0.1567	0	0	0.0923	0	1	-0.673		Host targeted
PF3D7_1200300	rifin	RIF	3.922	0.2291	0.3171	0.2831	0.4237	0.2801	0	1	-1.269		Host targeted
PF3D7_0700500	rifin	RIF	2.2355	0.6644	0.0766	0	0	0	0	1	1.591		Host targeted
PF3D7_0732700	rifin	RIF	1.4498	0.0734	0	0	0.1018	0.0897	0	1	0.473		Host targeted
PF3D7_1479800	rifin	RIF	2.3197	0.3064	0.2385	0	0.1062	0.1873	0	1	0		Host targeted
PF3D7_0201200	rifin	RIF	0.5848	0.074	0	0	0.1026	0.4525	0	1	0.778		Host targeted
PF3D7_0400800	stevor	N/A	0.8399	0.3645	0	0	0	0.1114	0	1	-0.988		Host targeted
PF3D7_0421200	rifin	RIF	4.5124	0	0.079	0	0.1056	0.3724	0	1	-1.609		Host targeted
PF3D7_0901100	rifin	RIF	0.1982	0	0	0	0	0	0	1	-1.46		Host targeted
PF3D7_0901400	rifin	RIF	1.0904	0.8283	0.2344	0	0.4177	0.092	0	1	-2.338		Host targeted
PF3D7_1000300	rifin	RIF	1.2067	0.1527	0.2378	0	0.2118	0.1867	0	1	-1.958		Host targeted
PF3D7_1040000	rifin	RIF	0.2899	0.0734	0	0	0.2036	0.9873	0	1	1.967		Host targeted
PF3D7_1040400	rifin	RIF	0.2991	0.3029	0	0	0	0.1851	0	1	-1.715		Host targeted
PF3D7_1040500	rifin	RIF	1.7844	1.2801	0.4688	0	0.2088	0.4602	0	1	-0.715		Host targeted
PF3D7_1040800	rifin	RIF	1.5282	0.0892	0.1853	0	0.1238	0.1091	0	1	-1.55		Host targeted
PF3D7_1041100	rifin	RIF	2.9083	2.3668	1.3101	1.7546	0.3282	0.4822	0	1	-1.565		Host targeted
PF3D7_1254000	rifin	RIF	0.7019	0.5331	0	0	0.2112	0	0	1	-1.685		Host targeted
PF3D7_1255000	rifin	RIF	3.0169	0.8402	1.3477	0.5663	0.4237	0.1867	0	1	0		Host targeted
PF3D7_1400800	rifin	RIF	3.5125	0.8337	0.173	0	0	0	0	1	-2.876		Host targeted
PF3D7_1479700	rifin	RIF	3.4895	7.5731	0.3143	0.8421	0.21	0.3703	1.3363	1	-0.403		Host targeted
PF3D7_0833500	erythrocyte membrane protein 1, PfEMP1	VAR	26.2886	13.7391	0.8579	1.2084	1.6794	0.5409	0.4109				Host targeted
PF3D7_0632800	erythrocyte membrane protein 1, PfEMP1	VAR	53.0099	20.3982	3.2097	3.4129	1.0641	0.5051	0.6248				Host targeted
PF3D7_0733000	erythrocyte membrane protein 1, PfEMP1	VAR	24.636	24.221	2.1872	2.0379	1.6097	0.5103	0.5389				Host targeted
PF3D7_1150400	erythrocyte membrane protein 1, PfEMP1	VAR	14.6544	7.8274	0.7472	3.2028	0.6696	0.3728	0.2989				Host targeted
PF3D7_0901700			6.4097	21.2138	70.9818	12.8908	5.4663	3.6847	0				Host targeted
PF3D7_0114100			0	0.4596	1.3118	0	0	0.1404	18.2495				Host targeted
PF3D7_1149400			14.2498	178.09	78.7641	0.933	3.6656	4.3083	0				Host targeted
PF3D7_0902700			2.9448	15.7169	22.3596	4.3639	2.7757	3.6702	7.2709				Host targeted
PF3D7_0101300			1.3269	14.559	0.3486	0	0.6213	0	5.9285				Host targeted
PF3D7_0809100			55.1129	13.2652	6.279	3.668	5.7851	3.5528	11.7147				Host targeted
PF3D7_0300100			15.2567	8.4194	1.9983	2.6598	1.7913	0.2924	0				Host targeted
PF3D7_1041300			15.1549	21.4452	0.9497	1.8746	0.9352	0.3533	1.2748				Host targeted
PF3D7_0223500			106.657	115.199	3.6523	10.5707	1.1108	0.9346	0.2141				Host targeted
PF3D7_0936900			2.8678	0.5082	0.6782	0	0.7049	0.6213	0				Host targeted
PF3D7_0324900			18.793	5.9072	2.5407	0.5869	2.1622	1.5783	2.7939				Host targeted
PF3D7_0937800			13.5343	7.2114	5.2196	1.5138	3.8356	2.1398	1.4413				Host targeted
PF3D7_0114000			6.7738	3.5023	5.827	2.2752	20.8072	25.5363	78.6853				Host targeted
PF3D7_1255200			34.5046	38.0554	1.6078	2.8929	1.0016	0.655	0.8221				Host targeted
PF3D7_1000100			11.1434	4.1732	5.0284	2.6655	1.3243	1.1097	2.4962				Host targeted
PF3D7_0115700			16.7507	6.6195	1.0827	0.9779	0.8149	0.733	0.4232				Host targeted
PF3D7_1240600			124.352	23.7761	3.8472	2.4907	4.3646	6.8184	74.1066				Host targeted
PF3D7_0712900			21.4044	19.2954	0.8505	0.8934	0.3844	0.3094	1.0633				Host targeted
PF3D7_1100800			0.7499	1.1392	0.7094	0	0.158	1.3927	32.1639				Host targeted
PF3D7_1477000			4.0188	2.009	0.2707	0.0967	0.0723	0.287	0				Host targeted
PF3D7_0223100			1.8922	1.038	0.2486	0	0.2214	0	0				Host targeted
PF3D7_0632500			10.9359	4.6846	1.3871	2.3532	0.9639	0.4983	0.7075				Host targeted
PF3D7_1373500			29.054	20.1436	3.7001	1.5858	2.1921	0.9007	1.8873				Host targeted
PF3D7_1240400			26.173	14.0584	1.3787	2.4835	2.3871	1.8218	12.0263				Host targeted
PF3D7_0426000			12.2352	2.5938	0.842	0.8657	0.6649	0.526	0.8676				Host targeted
PF3D7_0712400			17.8782	4.0573	0.2125	0.5218	0.1952	0.266	0.9033				Host targeted
PF3D7_1372500			14.4023	177.748	8.8103	59.6905	0.2427	0	0				Host targeted
PF3D7_0800300			29.59	55.5116	2.1716	8.4462	1.5494	0.9647	0				Host targeted
PF3D7_0800100			17.0945	22.5548	1.5131	2.5866	1.2789	0.7769	0.8795				Host targeted
PF3D7_1200400			18.3162	8.3512	1.5532	0.8218	6.0603	8.8319	1.9561				Host targeted
PF3D7_0200100			28.1904	3.3655	1.2978	1.6023	1.1134	0.6794	0				Host targeted
PF3D7_1300100			11.5825	8.2969	2.4602	2.4911	1.3218	0.5079	1.078				Host targeted
PF3D7_0808700			22.6205	4.4761	0.7988	0.395	1.8394	1.6069	2.7163				Host targeted
PF3D7_1476900			2.4943	0.3789	0.6882	0.3511	4.7299	1.5055	3.3432				Host targeted
PF3D7_0800200			5.8906	5.8425	0.8347	0.514	1.8975	1.2771	2.7731				Host targeted
PF3D7_1240300			13.921	8.6769	4.0207	1.3324	3.1712	1.4282	1.7619				Host targeted
PF3D7_0700100			6.3293	3.2127	1.1874	2.1418	0.2724	0.2825	0				Host targeted
PF3D7_0400400			11.107	14.2592	1.2576	2.7684	1.1627	0.8012	0.8068				Host targeted
PF3D7_1477500			66.3972	167.656	18.0678	1.1732	4.6827	7.7394	6.5162				Host targeted
PF3D7_1039700			0.4499	4.3291	0.2364	0	0	0	16.0819				Host targeted
PF3D7_1300300			13.0992	12.5794	0.7621	1.7855	0.2847	0.3572	0.6967				Host targeted
PF3D7_0412400			671.705	11.6843	3.6242	1.5072	1.2274	0.8626	6.964				Host targeted
PF3D7_0617400			41.3339	31.0542	2.5998	4.0497	2.6937	1.3626	2.142				Host targeted
PF3D7_1034100			0.7403	0.9372	6.8089	2.7792	15.5986	41.4788	39.6917				Host targeted
PF3D7_0700800			0.2999	12.8733	0.4729	0	0.474	0.5571	26.1332				Host targeted
PF3D7_0817500			319.525	206.611	957.406	422.431	1394.54	747.699	1130.84				Host targeted
PF3D7_0832000			9.2713	6.3467	11.0082	0	2.291	0.744	3.0682				Host targeted
PF3D7_1232800			2.4332	12.753	12.6601	2.0553	34.8624	112.754	58.7049				Host targeted
PF3D7_1400200			3.9085	7.748	0.3757	0.8052	0.2008	0.177	0				Host targeted
PF3D7_1001800			42.7951	2.9367	28.6914	22.1465	0.1404	1.4856	0				Host targeted
PF3D7_1149500			39.1041	4.2477	1.5021	0	0.0436	0.8078	0				Host targeted
PF3D7_0221700			24.5826	3.0496	13.0488	1.7848	0.0742	1.1773	2.8322				Host targeted
PF3D7_1253200			25.1028	0.3775	3.5267	0	0.7855	0.9232	0				Host targeted
PF3D7_1102900			17.5591	0.8565	0.3809	0	0	0.1495	0				Host targeted
PF3D7_0800900			10.012	0.8726	0.3881	0	0	0.3048	35.1983				Host targeted
PF3D7_1253300			22.9721	3.2075	3.0626	0	0.7117	0.3137	0				Host targeted
PF3D7_0702100			24.6472	0.5899	9.3475	1.1663	1.6364	2.0675	9.7162				Host targeted
PF3D7_1252900			21.0607	0	1.6843	0	0.9646	0.5668	0				Host targeted
PF3D7_1478300			1.8122	0.1376	0.1428	0	0.5727	1.178	0				Host targeted
PF3D7_1477200			0.7466	0.6806	0.9418	0	2.6745	1.2481	0				Host targeted
PF3D7_0732500			2.7053	5.8104	0.6618	2.1012	0.1965	0.1732	0				Host targeted
PF3D7_1478500			1.8382	1.496	0.414	0	0	0.1219	0				Host targeted
