# Supplementary material for: Targeting Host Metabolic Niche to Kill Malaria Parasites
Source: Research Square preprint supplement (doi:10.21203/rs.3.rs-4535885/v1), 2024-07-12
Supplement: Supplementary file 4 [file fb76054ee0712b281370e353.xlsx]

## Sheet: Supplemental Table S2
Supplemental Table S2. Human mature red blood cell proteome analysis related to heme metaboism
Gene Symbol	Uniprot Entry	Protein names	Gene Names	Length	EC number	Subcellular location [CC]	RBCproteomeStructualComplex (peptide counts)	Whole erythrocyte:copy number Donor 1	Whole erythrocyte:copy number Donor 2	Whole erythrocyte:copy number Donor 3	Whole erythrocyte:copy number Donor 4	White ghosts:copy number Donor 1	White ghosts:copy number Donor 2	White ghosts:copy number Donor 3	White ghosts:copy number Donor 4
ALAS1	P13196	5-aminolevulinate synthase, non-specific, mitochondrial (ALAS-H) (EC 2.3.1.37) (5-aminolevulinic acid synthase 1) (Delta-ALA synthase 1) (Delta-aminolevulinate synthase 1)	ALAS1 ALAS3 ALASH OK/SW-cl.121	640	2.3.1.37	Mitochondrion inner membrane {ECO:0000250|UniProtKB:P22557}; Peripheral membrane protein {ECO:0000250|UniProtKB:P22557}. Note=Localizes to the matrix side of the mitochondrion inner membrane. {ECO:0000250|UniProtKB:P22557}.	18
ALAS2	P22557	5-aminolevulinate synthase, erythroid-specific, mitochondrial (ALAS-E) (EC 2.3.1.37) (5-aminolevulinic acid synthase 2) (Delta-ALA synthase 2) (Delta-aminolevulinate synthase 2)	ALAS2 ALASE ASB	587	2.3.1.37	[Isoform 4]: Mitochondrion inner membrane {ECO:0000269|PubMed:14643893}; Peripheral membrane protein {ECO:0000305}. Note=Localizes to the matrix side of the mitochondrion inner membrane. {ECO:0000269|PubMed:14643893}.	9
ALAD	P13716	Delta-aminolevulinic acid dehydratase (ALADH) (EC 4.2.1.24) (Porphobilinogen synthase)	ALAD	330	4.2.1.24		31237	751746	715563	921478	841912	182163	143856	144304	116880
HMBS	P08397	Porphobilinogen deaminase (PBG-D) (EC 2.5.1.61) (Hydroxymethylbilane synthase) (HMBS) (Pre-uroporphyrinogen synthase)	HMBS PBGD UPS	361	2.5.1.61	Cytoplasm {ECO:0000305}.	5490	210899	144134	192106	146098	3594	1281.4	1349.4	1164.9
UROS	P10746	Uroporphyrinogen-III synthase (UROIIIS) (UROS) (EC 4.2.1.75) (Hydroxymethylbilane hydrolyase [cyclizing]) (Uroporphyrinogen-III cosynthase)	UROS	265	4.2.1.75		4288	10553.8	5385.7	7904.7	6266.7	357.2	56	62.9	154.1
UROD	P06132	Uroporphyrinogen decarboxylase (UPD) (URO-D) (EC 4.1.1.37)	UROD	367	4.1.1.37	Cytoplasm.	8663	24575.5	58931.1	43856.3	56769.8	2614.9	3095.4	2116.4	2586.4
CPOX	P36551	Oxygen-dependent coproporphyrinogen-III oxidase, mitochondrial (COX) (Coprogen oxidase) (Coproporphyrinogenase) (EC 1.3.3.3)	CPOX CPO CPX	454	1.3.3.3	Mitochondrion intermembrane space.	153	0	0	0	0	105.7	22.7	13.5	23.6
PPOX	P50336	Protoporphyrinogen oxidase (PPO) (EC 1.3.3.4)	PPOX	477	1.3.3.4	Mitochondrion inner membrane {ECO:0000250}; Peripheral membrane protein {ECO:0000250}; Intermembrane side {ECO:0000250}.	8
FECH	P22830	Ferrochelatase, mitochondrial (EC 4.98.1.1) (Heme synthase) (Protoheme ferro-lyase)	FECH	423	4.98.1.1	Mitochondrion inner membrane; Peripheral membrane protein; Matrix side.	19	0	0	0	0	673.4	191.8	10.3	16.3
FLVCR2	Q9UPI3	Heme transporter FLVCR2 (Calcium-chelate transporter) (CCT) (Feline leukemia virus subgroup C receptor-related protein 2)	FLVCR2 C14orf58	526		Mitochondrion membrane {ECO:0000269|PubMed:32973183}; Multi-pass membrane protein {ECO:0000255}. Endoplasmic reticulum membrane {ECO:0000269|PubMed:32973183}; Multi-pass membrane protein {ECO:0000255}. Cell membrane {ECO:0000305|PubMed:14729055}; Multi-pass membrane protein {ECO:0000255}. Note=Primarily resides in mitochondria where it interacts with components of the electron transfer chain comp…
FLVCR1	Q9Y5Y0	Heme transporter FLVCR1 (Feline leukemia virus subgroup C receptor-related protein 1) (Feline leukemia virus subgroup C receptor) (hFLVCR)	FLVCR1 FLVCR	555		[Isoform 2]: Mitochondrion membrane {ECO:0000250|UniProtKB:B2RXV4}; Multi-pass membrane protein {ECO:0000255}. Note=Colocalizes with HADHA. {ECO:0000250|UniProtKB:B2RXV4}.	10
SLC40A1	Q9NP59	Solute carrier family 40 member 1 (Ferroportin-1) (Iron-regulated transporter 1)	SLC40A1 FPN FPN1 IREG1 SLC11A3 MSTP079	571		Cell membrane {ECO:0000269|PubMed:10882071, ECO:0000269|PubMed:15692071, ECO:0000269|PubMed:23219802, ECO:0000269|PubMed:24304836, ECO:0000269|PubMed:29237594, ECO:0000269|PubMed:30247984}; Multi-pass membrane protein {ECO:0000269|PubMed:32814342}. Basolateral cell membrane {ECO:0000269|PubMed:29792530}; Multi-pass membrane protein {ECO:0000269|PubMed:32814342}. Note=Localized to the basolateral …	5097	1244.9	1804.1	2291.5	6518.1	16055.7	14315.7	16999.4	16628.6
TFRC	P02786	Transferrin receptor protein 1 (TR) (TfR) (TfR1) (Trfr) (T9) (p90) (CD antigen CD71) [Cleaved into: Transferrin receptor protein 1, serum form (sTfR)]	TFRC	760		[Transferrin receptor protein 1, serum form]: Secreted {ECO:0000269|PubMed:17081065}.	494	0	226.2	31.5	526.7	273.4	88.2	0	6.5
HMOX1	P09601	Heme oxygenase 1 (HO-1) (EC 1.14.14.18) [Cleaved into: Heme oxygenase 1 soluble form]	HMOX1 HO HO1	288	1.14.14.18	Endoplasmic reticulum membrane {ECO:0000269|PubMed:19556236, ECO:0000269|PubMed:22419571, ECO:0000269|PubMed:27184847}; Single-pass type IV membrane protein {ECO:0000255}; Cytoplasmic side {ECO:0000269|PubMed:22419571}.	33
HMOX2	P30519	Heme oxygenase 2 (HO-2) (EC 1.14.14.18) [Cleaved into: Heme oxygenase 2 soluble form]	HMOX2 HO2	316	1.14.14.18	Microsome membrane {ECO:0000305|PubMed:7890772}; Single-pass type IV membrane protein {ECO:0000255}; Cytoplasmic side {ECO:0000250|UniProtKB:P09601}. Endoplasmic reticulum membrane {ECO:0000250|UniProtKB:P09601}; Single-pass type IV membrane protein {ECO:0000255}; Cytoplasmic side {ECO:0000250|UniProtKB:P09601}.	19
BLVRA	P53004	Biliverdin reductase A (BVR A) (EC 1.3.1.24) (Biliverdin-IX alpha-reductase)	BLVRA BLVR BVR	296	1.3.1.24	Cytoplasm, cytosol {ECO:0000269|PubMed:7929092, ECO:0000269|PubMed:8424666}.	7129	661649	150356	205728	138356	4669.5	2161	2198.5	2436
BLVRB	P30043	Flavin reductase (NADPH) (FR) (EC 1.5.1.30) (Biliverdin reductase B) (BVR-B) (EC 1.3.1.24) (Biliverdin-IX beta-reductase) (Green heme-binding protein) (GHBP) (NADPH-dependent diaphorase) (NADPH-flavin reductase) (FLR)	BLVRB FLR	206	1.3.1.24; 1.5.1.30	Cytoplasm {ECO:0000269|PubMed:7929092}.	70829	7.55174e+06	6.24987e+06	7.55484e+06	7.2971e+06	53802.5	32543.2	29462.2	35781.8
HEBP1	Q9NRV9	Heme-binding protein 1 (p22HBP)	HEBP1 HBP	189		Cytoplasm {ECO:0000269|PubMed:12413491}.	6895	122399	170113	176678	145006	1030.4	728.5	540.8	540.7
HEBP2	Q9Y5Z4	Heme-binding protein 2 (Placental protein 23) (PP23) (Protein SOUL)	HEBP2 C6orf34 SOUL	205		Cytoplasm {ECO:0000269|PubMed:17098234}. Mitochondrion {ECO:0000269|PubMed:17098234}. Note=Mainly localized to the cytoplasm with a much lower abundance in the mitochondrion. {ECO:0000269|PubMed:17098234}.	1500	1274	1273.7	3228	5545.5	28.4	0	0	0
UQCRH	P07919	Cytochrome b-c1 complex subunit 6, mitochondrial (Complex III subunit 6) (Complex III subunit VIII) (Cytochrome c1 non-heme 11 kDa protein) (Mitochondrial hinge protein) (Ubiquinol-cytochrome c reductase complex 11 kDa protein)	UQCRH	91		Mitochondrion inner membrane {ECO:0000250|UniProtKB:P00127}; Peripheral membrane protein {ECO:0000250|UniProtKB:P00127}; Intermembrane side {ECO:0000250|UniProtKB:P00127}.
UQCR10	Q9UDW1	Cytochrome b-c1 complex subunit 9 (Complex III subunit 9) (Complex III subunit X) (Cytochrome c1 non-heme 7 kDa protein) (Ubiquinol-cytochrome c reductase complex 7.2 kDa protein)	UQCR10 UCRC HSPC119	63		Mitochondrion inner membrane {ECO:0000250|UniProtKB:P22289}; Single-pass membrane protein {ECO:0000250|UniProtKB:P22289}.	23
CYC1	P08574	Cytochrome c1, heme protein, mitochondrial (EC 7.1.1.8) (Complex III subunit 4) (Complex III subunit IV) (Cytochrome b-c1 complex subunit 4) (Ubiquinol-cytochrome-c reductase complex cytochrome c1 subunit) (Cytochrome c-1)	CYC1	325	7.1.1.8	Mitochondrion inner membrane {ECO:0000250|UniProtKB:P07143}; Single-pass membrane protein {ECO:0000250|UniProtKB:P07143}.	63
COX10	Q12887	Protoheme IX farnesyltransferase, mitochondrial (EC 2.5.1.141) (Heme O synthase)	COX10	443	2.5.1.141	Mitochondrion membrane; Multi-pass membrane protein.	1
EIF2AK1	Q9BQI3	Eukaryotic translation initiation factor 2-alpha kinase 1 (EC 2.7.11.1) (Heme-controlled repressor) (HCR) (Heme-regulated eukaryotic initiation factor eIF-2-alpha kinase) (Heme-regulated inhibitor) (hHRI) (Hemin-sensitive initiation factor 2-alpha kinase)	EIF2AK1 HRI KIAA1369 PRO1362	630	2.7.11.1		12
BACH1	Q9BX63	Fanconi anemia group J protein (EC 3.6.4.12) (BRCA1-associated C-terminal helicase 1) (BRCA1-interacting protein C-terminal helicase 1) (BRCA1-interacting protein 1)	BRIP1 BACH1 FANCJ	1249	3.6.4.12	Nucleus {ECO:0000269|PubMed:11301010, ECO:0000269|PubMed:23585563}. Cytoplasm {ECO:0000269|PubMed:23585563}.	13
GATA2	P23769	Endothelial transcription factor GATA-2 (GATA-binding protein 2)	GATA2	480		Nucleus.	10
FOXO1	Q12778	Forkhead box protein O1 (Forkhead box protein O1A) (Forkhead in rhabdomyosarcoma)	FOXO1 FKHR FOXO1A	655		Cytoplasm {ECO:0000269|PubMed:11237865, ECO:0000269|PubMed:11311120, ECO:0000269|PubMed:12228231, ECO:0000269|PubMed:19221179, ECO:0000269|PubMed:20543840, ECO:0000269|PubMed:21245099, ECO:0000269|PubMed:25009184, ECO:0000269|PubMed:31063815}. Nucleus {ECO:0000269|PubMed:11311120, ECO:0000269|PubMed:12228231, ECO:0000269|PubMed:20543840, ECO:0000269|PubMed:25009184, ECO:0000269|PubMed:31063815}. …	23
